# 1 **Mouse Academy: high-throughput automated training and trial-by-** 2 **trial behavioral analysis during learning**

3  
4 Mu Qiao<sup>1</sup>, Tony Zhang<sup>1</sup>, Cristina Segalin<sup>2</sup>, Sarah Sam<sup>1</sup>, Pietro Perona<sup>2,3</sup> & Markus Meister<sup>1,3\*</sup>

5  
6 <sup>1</sup>Division of Biology and Biological Engineering, California Institute of Technology, Pasadena,  
7 CA 91125, USA

8  
9 <sup>2</sup>Division of Engineering and Applied Sciences, California Institute of Technology, Pasadena,  
10 CA 91125, USA

11  
12 <sup>3</sup>Tianqiao and Chrissy Chen Institute for Neuroscience, California Institute of Technology,  
13 Pasadena, CA 91125, USA

14  
15 \*Correspondence: [meister@caltech.edu](mailto:meister@caltech.edu)

## 16 **ABSTRACT**

17 Progress in understanding how individual animals learn will require high-throughput  
18 standardized methods for behavioral training but also advances in the analysis of the resulting  
19 behavioral data. In the course of training with multiple trials, an animal may change its behavior  
20 abruptly, and capturing such events calls for a trial-by-trial analysis of the animal's strategy. To  
21 address this challenge, we developed an integrated platform for automated animal training and  
22 analysis of behavioral data. A low-cost and space-efficient apparatus serves to train entire  
23 cohorts of mice on a decision-making task under identical conditions. A generalized linear model  
24 (GLM) analyzes each animal's performance at single-trial resolution. This model infers the  
25 momentary decision-making strategy and can predict the animal's choice on each trial with an  
26 accuracy of ~80%. We also introduce automated software to assess the animal's detailed  
27 trajectories and body poses within the apparatus. Unsupervised analysis of these features  
28 revealed unusual trajectories that represent hesitation in the response. This integrated  
29 hardware/software platform promises to accelerate the understanding of animal learning.  
30

## 31 **INTRODUCTION**

32 Learning – the change of neural representation and behavior that results from past experience  
33 and the consequences of actions – is important for animals to survive and forms a central topic in  
34 neuroscience<sup>1</sup>. Different individuals may apply different strategies to the learning process,  
35 reflecting their individual personalities. Indeed, substantial differences in sensory biases,  
36 locomotion, motivation, and cognitive competence have been observed in populations of fruit  
37 flies<sup>2,3</sup>, rodents and primates<sup>4-6</sup>. Thus, it is critical to investigate learning at the individual level.  
38

39  
40 Rodents, especially the mouse, have become popular experimental animals in studying  
41 associative learning and decision-making, because of the wide availability of transgenic  
42 resources<sup>7-10</sup>. They can learn to perform complex decision-making tasks that probe cognitive  
43 components such as working memory and selective attention<sup>11-13</sup>. However, differences in  
44 learning strategies across individuals have rarely been addressed, partly owing to the limitations  
45 of data gathering and analysis.  
46

47 Studying differences among individuals requires training and collecting data from multiple  
48 animals in a standardized and high-throughput fashion. The training procedures are often time-  
49 consuming, requiring several days to many weeks<sup>8,9</sup>, depending on the task. Although there have  
50 been advances in training automation, existing systems either require an experimenter to move  
51 animals from the home cage to the training apparatus<sup>14-16</sup>, or training animals within their own  
52 cages<sup>17-19</sup>. The former introduces additional sources of variability<sup>20,21</sup>, and the latter precludes  
53 tasks that require a large training arena. Following data acquisition, the analysis of behavior aims  
54 at understanding the learning process. Present approaches tend to focus on the averaged  
55 performance over many trials<sup>22</sup>. However, changes in behavior may happen at a single trial, and  
56 thus the modeling of behavior should similarly offer a time resolution of single trials to assess  
57 each animal's individual approach to learning.

58  
59 To address these challenges, we present Mouse Academy, an integrated platform for automated  
60 training of group-housed mice and analysis of behavioral changes in learning a decision-making  
61 task. We designed hardware that makes use of implanted radio frequency identification (RFID)  
62 chips to identify each mouse, and guides the animal into a behavior training box. Synchronized  
63 video recordings and decision-making sequences are acquired during animal learning. To  
64 analyze the decision-making sequences, we developed an iterative generalized linear model  
65 (GLM). This model makes a prediction of the animal's choice in each trial and gets updated  
66 based on the animal's actual choice. This iterative GLM model achieves a prediction accuracy of  
67 ~80%, and also reveals the decision-making strategy of the animal and how it changes over time.  
68 To analyze the animal's behavior during the task in greater detail, we developed automated  
69 software that tracks the animal in video recordings and extracts its location and body pose using  
70 deep convolutional neural networks (CNNs). These features allowed us to perform an  
71 unsupervised analysis of each animal's behavior, and discover individual traits of behavioral  
72 learning that were not apparent from the simple choice sequences.

## 73 74 **RESULTS**

75 The Mouse Academy platform consists of three components (**Fig. 1**): an automated RFID sorting  
76 and animal training system, an iterative GLM to analyze decision-making sequences, and  
77 behavior assessment software that extracts animal trajectories from video data.

### 78 79 **Automated RFID sorting supports individual training programs**

80 We designed the equipment in the following manner (**Fig. 1a**): RFID-tagged mice are grouped in  
81 a common home cage where food and bedding is supplied. The home cage connects to a  
82 behavior training box through a gated tunnel. The gates are controlled by a home-made RFID  
83 animal sorting system<sup>23</sup>: three RFID antennas are placed along the tunnel, with one near the  
84 home cage, one near the training box and one between the two; the motorized gates are placed  
85 between the RFID sensors, separating the tunnel into three compartments. An Arduino  
86 microcontroller integrates information from the RFID readers to open and shut the gates,  
87 allowing only one animal at a time to pass through the tunnel (**Supplementary Figs. 1a, 1c, 1d**  
88 **and Supplementary Videos 1-4**). The behavior box is outfitted with three ports, each of which  
89 contains a photo-transistor to detect snout entry, a solenoid valve to deliver water reward, and a  
90 light emitting diode (LED) to present visual cues. To maintain a controlled environment, the  
91 training box is isolated from the outside by a light- and sound-proof chamber (**Supplementary**  
92 **Fig. 1b**).

93  
94 Once a mouse enters the training box, a protocol is set up to train the mouse to perform a certain  
95 task. In the experiments reported here, the animal must nose-poke the center port to initialize a  
96 trial and then hold the position for a short period. Visual or auditory stimuli are delivered, and  
97 based on these stimuli, the animal must choose to poke one of the side ports. If the correct  
98 response is chosen, the animal gets water reward from a lick tube in the response port, otherwise  
99 a timeout punishment is applied. This training process is controlled by Bpod, an Arduino  
100 microcontroller that interfaces with the three ports. Data from the response ports as well as video  
101 recordings from an overhead camera are acquired simultaneously as the animal is trained.

102  
103 The entire apparatus is orchestrated by a master program that coordinates the RFID sorting  
104 device, the Bpod system, synchronized video recording, data management and logging  
105 (**Supplementary Fig. 1e**). The program monitors the amount of water each animal consumes per  
106 day and regulates the time each animal can spend in the training box per session. In addition, the  
107 software updates the training protocol for each animal based on its performance, for example  
108 switching to a harder task once a simpler one has been mastered (**Supplementary Fig. 2**). This  
109 lets each animal learn at its own pace.

110  
111 The apparatus can be assembled at a materials cost of \$1500-2500, with the cheaper option using  
112 a Raspberry Pi computer as the controller (**Supplementary Fig. 1f** and **Supplementary Table**  
113 **1**). Compared with designs in which each animal is automatically trained in its own home  
114 cage<sup>15,17</sup>, the system saves considerable space. Because housing and training are independent  
115 modules, the same system can be used for diverse training environments.

116  
117 We tested the automated RFID sorting and animal training system by training group-house mice  
118 to learn a variety of decision tasks, following similar procedures as reported previously<sup>11,12</sup>  
119 (**Supplementary Fig. 2** and Online methods). The training period lasted 28 days, with up to five  
120 mice in the common home cage. Each animal occupied the training box for 3-4 hours per day  
121 (13-15% of the 24 hours) throughout the entire training period (**Figs. 2a, 2b** and **Supplementary**  
122 **Fig. 3**). For a sample cohort of four animals trained in sessions of 90 trials each, we found that  
123 the behavior box was occupied most of the time, with brief empty intervals of <10 min (**Figs. 2c,**  
124 **2d** and **2e**). Each animal was trained for over 900 trials (10 sessions), and consumed more than  
125 1.9 mL of water per day (**Fig. 2f**). Interestingly there was no circadian pattern to the animals'  
126 training activity, even though the setup was illuminated on a daily light cycle (12 h on / 12 h off)  
127 (**Fig. 2g**). As observed previously, it appears that animals working for a goal can avoid circadian  
128 modulation of the locomotor pattern<sup>24,25</sup>.

129  
130 **A generalized linear model accurately predicts decision-making during training**  
131 In a decision-making task, an animal is asked to associate distinct stimuli with distinct responses.  
132 Although this is the ultimate goal, during learning, it is often observed that the animal begins by  
133 basing its decisions on unrelated input variables and gradually switches to using the stimulus  
134 variables that actually predict reward. We define a policy as a mapping of these variables to the  
135 animal's decisions. A fundamental goal in the study of learning is to infer what policy the animal  
136 follows at any given time and to determine how the policy evolves with experience.

137

138 We applied a generalized linear model (GLM) to map factors relevant to the animal's decision-  
139 making to its choices through logistic regression. A common way to build such a GLM is by  
140 fitting data of an entire session<sup>16,26</sup>. However, this loses resolution in single trials within the  
141 session. During learning, a change of policy can happen at each trial. Thus, we developed the  
142 model to make trial-by-trial choice predictions based on various factors the animal might  
143 plausibly use. The model works in an iterative two-step process (**Fig. 1b**). In the prediction step,  
144 the model makes a prediction for the next decision based on the input factors. Once the outcome  
145 of the animal's decision is observed, an error term between the model's prediction and the  
146 observation is computed. This error, after weighting by a reward factor and a temporal discount  
147 factor, is fed back to the loss function. In the update step, the model is updated by minimizing  
148 the regularized loss function. This iteration happens after every trial. The temporal discount  
149 factor accounts for the possibility that the most recent trials impact the current decision more  
150 than remote trials. The reward factor accounts for the fact that water rewards and timeout  
151 punishments may have effects of different magnitude on the updates of the animal's policy.

152  
153 We illustrate the utility of this model by fitting results from an easy visual task, in which one of  
154 the two choice ports lights up to indicate the location of the reward, and the optimal policy is to  
155 simply poke the port with the light (**Supplementary Fig. 2a, 2a'** and **2a''**). All the mice  
156 eventually reached a >83% performance level, comparable to what mice achieve in similar  
157 tasks<sup>19,27</sup>. The GLM makes a prediction for the outcome of each trial based on a weighted  
158 combination of several input variables: the current visual stimulus, a constant bias term, and  
159 three terms representing the history of previous trials (**Fig. 3a**). These inputs from a previous  
160 trial include the port choice, whether that choice was rewarded, and a term indicating the  
161 multiplicative interaction between the choice and reward (Choice x Reward). This term supports  
162 a strategy called win-stay-lose-switch (WSLS), which chooses the same port if it was rewarded  
163 previously and the opposite one if not. Since a GLM cannot multiply two inputs, we provided  
164 this interaction term explicitly. Each of the above terms has a weight coefficient that can be  
165 positive or negative. For instance, a positive weight for the visual stimulus supports turning  
166 towards the light, and a negative weight away from the light.

167  
168 To determine the extent of trial history that affects the animal's behavior, we fitted the model to  
169 the response data including history-dependent terms up to three previous trials. We found that  
170 only the immediately preceding trial had an appreciable effect on the prediction accuracy, and  
171 thus restricted further analysis to those inputs (**Fig. 3b**). The model also has three  
172 hyperparameters (the temporal discount factor  $\alpha$ , the reward factor  $r$ , and the regularization  
173 factor  $\lambda$ ), and we optimized them for each animal by grid search. We found that each animal  
174 had a different set of hyperparameters, reflecting differences in the learning process across  
175 individuals (**Fig. 3c**). Among the four sample mice, Animal 2 had the lowest temporal discount  
176 factor, suggesting that it weighed recent trials more heavily and updated the policy more quickly.  
177 Indeed, this is the animal that learned the fastest among the four (**Fig. 3d**).

178  
179 Predictions from the iterative GLM matched ~80% of the animals' actual choices (**Fig. 3f**), and  
180 the predicted accuracy of each animal captured the actual fluctuations of its learning curve (**Fig.**  
181 **3e** and **Supplementary Fig. 4**). We compared the performance of the GLM with two other  
182 modeling approaches (Online methods). The first model was fit to the animal's average  
183 performance in the task; its trial-by-trial match of the animal's actual choices was only ~59%

184 (Fig. 3g). The second model was a logistic regression fitted to data in a sliding window of  $N$   
185 trials. This sliding window model performed worse than the iterative GLM when the window  
186 size was small ( $N = 20$  and  $30$  trials, Fig. 3h); for larger windows the performance was  
187 comparable. Overall, the iterative model is advantageous because it makes predictions online as  
188 every trial occurs and adapts dynamically to the growing data set.

189

### 190 **Individual learning policies can be inferred from iterative GLM fitting**

191 The iterative GLM serves to infer what policy the animal follows in making decisions. The linear  
192 weight of each input term reflects its relative importance for the decision. By following this  
193 weight vector across trials one obtains a policy matrix that documents how the animal's policy  
194 changes during learning (Figs. 1b and 4c). To test that the model can correctly capture a time-  
195 varying policy, we simulated decision-making data from a ground truth policy that changed at a  
196 certain frequency, including a certain level of noise in the behavioral output (Fig. 4a). Over a  
197 wide range of policy change frequencies and noise levels, the GLM was able to capture the  
198 ground truth policy (Figs. 4a and 4b). In addition, different values of policy change frequency  
199 and noise levels led to different sets of hyperparameters fitted from the model, showing that the  
200 GLM can adapt to individuals with diverse learning characteristics (Supplementary Figs. 5a-e).

201

202 We then recovered the policy matrix of each animal from the GLM fits. All four animals started  
203 with the non-optimal policy of WSLS. Subsequently each animal followed its own learning  
204 process (Fig. 4c): Animal 2 had a clear bias towards the right port at the beginning but it rapidly  
205 found the optimal policy of following the light. The other three animals were slower learners.  
206 Animal 3 and Animal 4 followed similar processes to converge to the optimal policy. Animal 1  
207 was distinct from the others. At the early stages, it had a strong bias towards the left port and it  
208 made decisions based on whether the previous choice was rewarded.

209

210 We further validated the transition between policies during learning by analyzing the first and  
211 last sessions of each animal and counting how many choices could be explained by each policy  
212 (Fig. 4d). Indeed, we found a clear switch from the (non-optimal) WSLS policy to the (optimal)  
213 stimulus-based policy (Fig. 4e and Supplementary Fig. 5f). The animals might have been  
214 biased towards the WSLS strategy by a shaping method we used during training, which offered  
215 the animal a repeat of the same stimulus every time it made a mistake (Online methods). To test  
216 whether these correlations in the trial sequence influenced the final policy we performed two  
217 additional analyses. First, we only included trials following a correct trial, and performed logistic  
218 regression on these trials for each session. This analysis showed that at least on these trials, all  
219 the animals based their decisions on the light stimulus by the end of learning (Supplementary  
220 Fig. 6a). Second, we compared the error rate on trials following an incorrect choice with that  
221 following a correct one. We found no significant difference between the two error rates during  
222 the last session (Supplementary Figs. 6b and 6c), suggesting that the animals treated these two  
223 types of trials identically.

224

### 225 **Automated movement tracking reveals fine structure of behavioral responses**

226 Thus far the report has focused on the animal's responses only as sensed by the nose pokes into  
227 response ports. The GLM fits of those responses already revealed differences in policy across  
228 individuals. To gain further insight into these individual preferences, it is essential to track each  
229 animal's behavior along the way from stimuli to responses<sup>10</sup>. We thus developed software that

230 uses deep learning to automatically, quantitatively and accurately assess each animal's behavior  
231 during decision-making (**Figs. 1c** and **5a**).

232  
233 To track the animal location and body coordinates, we recorded videos of the animal from above,  
234 and analyzed them with a sequence of two deep convolutional neural networks (CNNs) that were  
235 pre-trained on annotated pose data (**Fig. 5a** and **Supplementary Videos 5-7**). The first CNN was  
236 based on the multi-scale convolutional (MSC) Multibox detector<sup>28</sup> (**Supplementary Fig. 7a**).  
237 For each frame of the video it computed a crop frame around the body of the mouse. The second  
238 CNN was a Stacked Hourglass Network<sup>29</sup> that used the cropped video frame to locate seven  
239 body landmarks: the nose, the ears, the neck, the body sides and the tail of the animal  
240 (**Supplementary Figs. 7a** and **7b**). These landmarks allowed precise identification of the  
241 animal's position and body pose (**Supplementary Fig. 7c**), from which we further extracted two  
242 features: the body centroid (average position of the seven landmarks) and the orientation (angle  
243 of the line connecting the centroid and the nose).

244  
245 To illustrate use of these behavioral trajectories, we focus on the period of the visual choice task  
246 where the animal reports its decision: from the time it leaves the center port to when it pokes one  
247 of the side ports. The trials fall into four groups based on location of the stimulus and the  
248 response. As expected, the trajectories of position and orientation clearly distinguish left from  
249 right choices (**Figs. 5b** and **5d**). Interestingly, the trajectories also reveal whether the decision  
250 was correct: On incorrect decision, the trajectories reversed direction after ~0.5 s, because the  
251 animal quickly turned back to the center after finding no reward in the chosen port (**Figs. 5c, 5e**  
252 and **Supplementary Video 5**). A linear kernel support vector machine (SVM), trained to predict  
253 the category of each trial from a 1 s trajectory, was able to correctly distinguish correct and  
254 incorrect choices with an accuracy of over 90% (**Supplementary Fig. 8**). In addition, many of  
255 the trajectories were highly asymmetric and again revealed differences across individuals. For  
256 instance, Animal 2 and Animal 4 started from a location close to the right port, Animal 1 closer  
257 to the left port (**Fig. 5c**). This asymmetry correlates with the bias revealed by the iterative GLM:  
258 each animal prefers to select the port closer to its body location.

### 259 260 **Unsupervised behavioral analysis reveals moments of hesitation**

261 Whereas the supervised learning discussed above relies on prior classification of stimuli and  
262 responses, an unsupervised analysis has the potential to discover unexpected structures in the  
263 animal's behavior<sup>30</sup>. We thus performed an unsupervised classification of the behavioral  
264 trajectories.

265  
266 After subjecting all the trajectories of a given animal to principal component analysis (PCA) we  
267 projected the data onto the top three components, which explained over 95% of the variance  
268 (**Figs. 6a, 6b** and **Supplementary Fig. 9a**). Importantly, without any labels from trial types,  
269 these three PCs captured meaningful features that differentiated the animal's responses. The first  
270 PC separated movements to the left from those to the right (**Figs. 6a** and **6b**). The third PC  
271 captured the turning-back behavior after an incorrect choice (**Fig. 6b** and **Supplementary Fig.**  
272 **9a**). The second PC captured different baseline positions (**Fig. 6b**). Each animal has its own  
273 preference for a baseline position somewhere off the midline of the chamber (**Supplementary**  
274 **Fig. 9b**).

275

276 We also projected the trajectories into 2 dimensions using a non-linear embedding method, t-  
277 distributed stochastic neighbor embedding<sup>31,32</sup> (t-SNE). Unlike PCA, this graph prioritizes the  
278 preservation of local structures within the data instead of the global structure<sup>32</sup>. In the t-SNE  
279 space the trajectories formed clear clusters (**Fig. 6c**). Most of the clusters are dominated by one  
280 of the decision categories (**Fig. 6c** and **Supplementary Fig. 9c**). Interestingly, we found clusters  
281 in Animals 2, 3, and 4, in which the centroid trajectories were flat, unlike the trajectories of the  
282 four decision categories (**Fig. 6d**), suggesting that animals hesitated in these trials and made  
283 decisions only after a delay. Indeed, in trials flagged by these clusters, the animals had longer  
284 reaction times (**Fig. 6e**). Furthermore, such hesitating responses were more common following  
285 an incorrect trial (**Fig. 6f**); they may reflect a behavioral adjustment to prevent further mistakes<sup>33</sup>.

## 286 287 **DISCUSSION**

288 Despite the fact that rodents can be trained to perform interesting decision-making tasks<sup>7-10</sup>, the  
289 learning progress of individual animals has rarely been addressed. Doing so requires training and  
290 observing many animals in parallel under identical conditions, and the ability to analyze the  
291 decision policy of each animal on a trial-by-trial basis. To meet these demands, we developed  
292 Mouse Academy, an integrated platform for automated training and behavior analysis of  
293 individual animals.

294  
295 We demonstrate here that Mouse Academy can train group-housed mice in an automated and  
296 highly efficient manner while simultaneously acquiring decision-making sequences and video  
297 recordings. Automated animal training has been of great interest in recent years and efforts have  
298 focused on two directions. In one design, multiple animals are trained in parallel within stacks of  
299 training boxes. This requires a technician to transfer animals from their home cages to the  
300 behavior boxes<sup>14-16</sup>. Such animal handling has been reported to introduce additional  
301 variability<sup>20,21</sup>, and even the mere presence of an experimenter can influence behavioral  
302 outcomes<sup>34</sup>. Thus, eliminating the requirement for human intervention, as in Mouse Academy,  
303 likely reduces experimental variation. In another design, a training setup is incorporated within  
304 the animals' home cage<sup>17-19</sup>. By contrast, Mouse Academy separates the functions of housing and  
305 training, and that modular design allows easy adaptation to a different purpose. For instance, one  
306 can replace the 3-port discrimination box with a maze to study spatial navigation learning<sup>35,36</sup>, or  
307 with an apparatus for training under voluntary head-fixation<sup>37</sup>. In each case, a single training  
308 apparatus can serve many mice, potentially from multiple home cages.

309  
310 To understand how an animal's decision-making policies change in the course of learning, we  
311 developed a trial-by-trial iterative GLM. The evolution of the model is similar to online machine  
312 learning<sup>38</sup> in which the data are streamed in sequentially, rather than in batch mode. The linear  
313 nature of the model supports a straightforward definition of the animal's decision policy, namely  
314 as the vector of weights associated with different input variables. In addition, the simple linear  
315 structure allows rapid execution of the algorithm, which favors its use in real-time closed-loop  
316 behavior experiments. The model also allows several parametric adjustments. One specifies how  
317 much the recent trials are weighted over more distant ones in shaping the animal's policy.  
318 Another rates the relative influence of reward versus punishments. Fitting these parameters to  
319 each animal already revealed differences in learning style. This model can have a broader use  
320 beyond mouse decision-making, for instance to track the progress of human learners from their  
321 answers to a series of quizzes<sup>39</sup>.

322  
323 Finally we presented software for automated assessment of behaviors based on video recordings  
324 within Mouse Academy. Largely extending existing methods, the software uses deep  
325 convolutional neural networks for animal tracking and pose estimation. Because the animal's  
326 movements are unconstrained, we performed the tracking in two stages: the first finds the animal  
327 within the video frame and the second locates the body landmarks. Compared to a single-shot  
328 procedure, this split approach requires fewer learning examples and less computation in the  
329 second stage<sup>38</sup>. The resulting behavioral trajectories can reveal intricate aspects of the animal's  
330 decision process that are hidden from a mere record of the binary choices. The large data volume  
331 again calls for automated analysis, and both supervised machine learning methods<sup>30,40,41</sup> and  
332 unsupervised classification<sup>30-32,42</sup> have been employed for this purpose. Unsupervised analysis is  
333 not constrained by class labels, and can identify hidden structure in the data in an unbiased  
334 manner. In the present case, we discovered a motif wherein the animal hesitates on certain trials  
335 before taking action.

336  
337 Mouse Academy can be combined with chronic wireless recording<sup>43,44</sup>, to allow synchronized  
338 data acquisition of neural responses. Researchers can seek correlations between neural activity  
339 and the policy matrix or even the behavioral trajectories. This will open the door to a mechanistic  
340 understanding of how neural representations and dynamics change in the course of animal  
341 learning.

## 342 343 **ONLINE METHODS**

### 344 **Animals**

345 Subjects were C57BL/6J male mice aged 8-12 weeks. All experiments were conducted in  
346 accordance with protocols approved by the Institutional Animal Care and Use Committee of the  
347 California Institute of Technology.

### 348 349 **Hardware setup**

350 The hardware setup comprises a behavioral training box, an engineered home cage, and a radio  
351 frequency identification (RFID) sorting system, which allows animals to move between the  
352 home cage and the training box. These components are coordinated by customized software.

353  
354 The design file for the behavior box was modified from that of Sanworks LLC  
355 (<https://github.com/sanworks/Bpod-CAD>) using Solid-Works computer-aided design software  
356 and the customized behavioral training box was manufactured in the lab. The behavior box is  
357 controlled by a Bpod state machine (r0.8, Sanworks LLC). To monitor the animal's behavior, an  
358 IR webcam (Ailipu Technology or OpenMV Camera M7) is installed above the behavior box.  
359 The behavior box and the webcam are placed within a light- and sound-proof chamber. The  
360 chamber is made of particle board with walls covered by acoustic foam. A tunnel made of red  
361 plastic tubes connects the behavior box to a home cage (**Supplementary Fig. 1b**).

362  
363 For the RFID access control system, an Arduino Mega 2560 microcontroller is connected with  
364 three RFID readers (ID-12LA, Sparkfun) with custom antenna coils spaced along the access  
365 tunnel. The microcontroller controls two generic servo motors fitted with plastic gates to grant  
366 individual access to the training box (**Supplementary Fig. 1a**).

367



368 The microcontroller identifies each animal by its implanted RFID chip and permits only one  
369 animal to go through the tunnel connecting the home cage and the behavioral training box  
370 (**Supplementary Fig. 1c**). It also communicates the animal's identity to a master program  
371 running on a PC or Raspberry Pi (Matlab or Python). The master program coordinates the  
372 following programs: Bpod (<https://github.com/sanworks/Bpod>), synchronized video recording,  
373 data management and logging. A repository containing the design files, the firmware code for the  
374 microcontroller, and the software can be found in  
375 [https://github.com/muqiao0626/Mouse\\_Academy](https://github.com/muqiao0626/Mouse_Academy).

### 376 377 **Behavior training**

378 The training procedures of mice to perform a selective attention task are similar to those  
379 previously reported<sup>11,12</sup>. Mice were water restricted for seven days before training, and  
380 habituated in the automated training system to collect reward freely for several sessions. Then  
381 the mice were trained in sessions, each of which was made of 90 trials, to collect water rewards  
382 by performing two alternative forced choice tasks. Briefly, the animal had to nose-poke one of  
383 two choice ports based on the presented stimuli. If the decision was correct, 10% sucrose-  
384 sweetened water (3  $\mu$ L) was delivered to the animal. For incorrect responses, the animal was  
385 punished with a five-second timeout. Following an incorrect response, the animal was presented  
386 with the identical trial again; this simple shaping procedure helps counter-act biases in the  
387 behavior.

388 Over 28 days of training the animals learned increasingly complex tasks, from visual  
389 discrimination to a two-modality cued attention switching task<sup>11,12</sup>. The training progressed  
390 through six stages (**Supplementary Fig. 2**):

- 391 1. A simple visual task: In this task, the animal initiates a trial by poking the center port and  
392 holding the position for 100 ms. Then either the left or right side port light up briefly until  
393 the animal moves away from the center port. The animal must then poke one of the two  
394 side ports within the decision period of 10 s. Choice of the port flagged by the light leads  
395 to a water reward, and choice of the other port leads to a time-out period during which no  
396 trials can be initiated. Data presented in the main text are from this stage of training only.
- 397 2. A simple auditory task: As Stage 1, except that the stimulus was white noise sound either  
398 the left or the right side to flag the reward port.
- 399 3. A cued single-modality (visual or auditory) switching task: Blocks of 15 trials consisting  
400 of single-modality (visual or auditory) stimulus presentation. Each block was like stages  
401 1 or 2, except that the trial type was indicated by a 7 kHz (visual) or 18 kHz (auditory)  
402 pure tone.
- 403 4. A cued single- and double-modality switching task: Like stage 3, but distracting trials  
404 were introduced in which both visual and auditory stimuli were present, but only one of  
405 the modalities was relevant to the decision. The relevant modality was again indicated by  
406 the pure tone cues. In repeating blocks, four types of trials were presented: a. five visual-  
407 only trials; b. ten 'attend to vision' trials with auditory distractors; c. five auditory-only  
408 trials; d. ten 'attend to audition' trials with visual distractors. During the training, the time  
409 that the animal had to hold in the center port was gradually increased to 0.5 s, and the  
410 duration of the stimuli was gradually shortened to 0.2 s.
- 411 5. A cued double-modality switching task: Like stage 4 except that the single-modality trials  
412 were removed, and the block length was gradually shortened to three trials.

413 6. A selective attention task: Like stage 5, but the block structure was abandoned and all  
414 eight possible trial types were randomized: (audition vs vision) x (sound left or right) x  
415 (light left or right).  
416

#### 417 **Iterative generalized linear model**

418 We modeled the animal's choice probability by a logistic regression. At each trial number  $t$ , the  
419 choice probability is defined as

$$420 \quad p(y_t = 1 | \mathbf{w}_{t-1}) = \frac{1}{1 + \exp(-\mathbf{w}_{t-1}^T \mathbf{x}_t)} \quad (1)$$

$$p(y_t = -1 | \mathbf{w}_{t-1}) = 1 - p(y_t = 1 | \mathbf{w}_{t-1})$$

421 where  $y_t$  indicates the binary choice of the animal (1 = right, -1 = left),  $\mathbf{x}_t$  is the vector of input  
422 factors on trial  $t$ , and  $\mathbf{w}_{t-1}$  is the vector of weights for these factors obtained from fitting up to the  
423 preceding trial.  
424

425 The prediction  $y_t^*$  for the animal's choice is simply that with the higher model probability:

$$426 \quad y_t^* = \arg \max_{y \in \{-1, +1\}} p(y | \mathbf{x}_t, \mathbf{w}_{t-1}) \quad (2)$$

427 After observing the animal's actual choice  $z_t$ , the cross-entropy error  $E_t$  between the  
428 observation and model prediction is calculated as

$$429 \quad E_t = -\log p(z_t | \mathbf{x}_t, \mathbf{w}_{t-1}) \quad (3)$$

430 We weight the error term by a reward factor  $R_t$ , and apply exponential temporal smoothing to  
431 get the loss function  $L_t$ :

$$432 \quad L_t = R_t E_t + \alpha L_{t-1} \quad (4)$$

433 where  $\alpha$  is the smoothing discount factor accounting for the effect that distant trials have less  
434 impact on decision-making than immediately preceding trials, and  $R_t$  is defined as

$$435 \quad R_t = \begin{cases} 1, & \text{if the choice is rewarded} \\ r, & \text{otherwise} \end{cases} \quad (5)$$

436 The values of  $R_t$  for rewarded and unrewarded trials may be different, accounting for the fact  
437 that rewards and punishments may have different effects on learning. For each time point, the  
438 weights in the model are determined by minimizing the loss function subject to L1 (lasso)  
439 regularization, namely

$$440 \quad \mathbf{w}_t = \arg \min_{\mathbf{w}} (L_t + \lambda \|\mathbf{w}\|_1) \quad (6)$$

441 Then  $\mathbf{w}_t$  is used for prediction of the next trial. For subsequent analysis, we only used  
442 predictions starting at the 15th trial. The three hyperparameters for the temporal discount factor  
443  $\alpha$ , the reward factor  $r$ , and the regularization factor  $\lambda$  were selected by grid search.  
444

445 To fit the decision-making sequences of the simple visual task, we included the following terms  
446 in the input vector  $\mathbf{x}_t$ :

- 447 1. Visual\_stimulus: +1 = light on right, -1 = light on left.
- 448 2. Bias: A constant value of +1. The associated weight determines whether the animal  
449 favors the left (negative) or the right (positive) port.
- 450 3. Choice\_back\_n: The choice the animal made  $n$  trials ago (+1 = right, -1 = left).
- 451 4. Reward\_back\_n: The reward the animal received  $n$  trials ago (+1 = reward, -1 =  
452 punishment).
- 453 5. Choice x Reward\_back\_n: The product of terms 4 and 5. This term corresponds to the  
454 win-stay-lose-switch (WLS) strategy of repeating the last choice if it was rewarded and  
455 switching if it was punished.

456  
457 To determine the extent of history-dependence of the animal's decisions, we fitted the model  
458 including terms 3-5 from up to three previous trials ( $n = 1, 2, 3$ ), and found that only the  
459 immediately preceding trial had an appreciable effect on the model's prediction accuracy. For the  
460 subsequent analysis, we therefore included terms 3-5 for the preceding trial ( $n = 1$ ).

461  
462 We compared the iterative generalized linear model (GLM) with two other models. The first  
463 only captures the animal's average performance over all trials. If the fraction of the correct  
464 responses is  $z$ , then the model simply predicts a correct response with probability  $z$ , and an error  
465 with probability  $1-z$ . Thus, the fraction of trials where the prediction matches the observation is  
466  $z^2 + (1-z)^2$ .

467  
468 The second model is a sliding window logistic regression. To make a prediction for trial  $t$ , we  
469 fitted the logistic model presented above (Eqns 1-2) to the preceding  $n$  trials. The loss function is

$$470 \quad L_t = - \sum_{i=t-n}^{t-1} \log p(z_t | \mathbf{x}_t, \mathbf{w}_{t-1}) \quad (7)$$

471 and the weights are again optimized as in Eqn 6.

### 472 473 **Recovering policy matrices from simulated data**

474 To test the model's ability in recovering policy matrices, we trained the model on data generated  
475 from pre-defined ground truth policies. The ground truth policies changed every 10 trials, 30  
476 trials, or 90 trials. Binary choices were simulated with different noise levels using the algorithm  
477 'epsilon-greedy': with a probability of epsilon, the simulator made a random choice and with a  
478 probability of  $1-\epsilon$  it chose the action indicated by the ground truth policy. The noise levels  
479 (epsilon values) ranged from 0 to 0.6. The similarity between the recovered policy and the  
480 ground truth policy was evaluated by the cosine between the recovered weight vector and the  
481 ground truth weight vector.

### 482 483 **Automated behavior assessment software**

484 In this section we describe each part of the software that constitutes the system we developed to  
485 track the mouse. The software is primarily made of two parts: mouse detection and pose  
486 estimation, each of which is implemented by a deep convolutional neural network (CNN) trained  
487 on annotated video data (**Supplementary Fig. 7a**). We collected a set of videos using red or IR

488 light illumination from the top of the arena. From these videos we extracted randomly a set of  
489 15,000 frames and asked Amazon Mechanical Turk (AMT) workers to click on body landmarks  
490 which give a representation of the skeleton of the mouse (**Supplementary Fig. 7b**).

491

### 492 **Mouse detection**

493 The architecture used for detection is the multi-scale convolutional (MSC) Multibox network<sup>28</sup>,  
494 which computes a list of bounding boxes along with a single confidence score for each box,  
495 corresponding to its likelihood of containing the object of interest, in this case a mouse. Each  
496 bounding box is encoded by 4 scalars, representing the coordinates of the upper-left and lower-  
497 right coordinates. The coordinates of each box are normalized with respect to image dimensions  
498 to deal with different image sizes, and their associated confidence score is encoded by an  
499 additional node (which outputs a value from 0 to 1). The loss function is the weighted sum of  
500 two losses: confidence and location<sup>28</sup>. We trained the MSC-Multibox deep CNN to predict  
501 bounding boxes that are spatially closest to the ground truth boxes while maximizing the  
502 confidence of containing the mouse.

503

504 In order to reach better and faster detection, we used prior bounding boxes whose aspect ratios  
505 closely match the distribution of the ground truth. As proposed previously by Erhan et al<sup>28</sup>, these  
506 priors were selected because their Intersection over Union (IoU) with respect to the ground truth  
507 was over 0.5. In the following matching process, each ground truth box is best matched to a  
508 prior, and the algorithm learns a residual between the two. At inference time, 100 bounding  
509 boxes are proposed, from which the best one is selected based on the highest score and non-  
510 maximum suppression.

511

512 We split the dataset into 12,750 frames for training, 750 for validation and 1,500 for testing.  
513 During training, we augmented data with random cropping and color variation. Using the  
514 Inception-ResNet-V2 architecture initialized with ImageNet pre-trained weights<sup>45</sup>, we finetuned  
515 the network with our training samples by updating the weights using stochastic gradient descent.  
516 For the optimizer, we used RMSPProp, with the batch size set to 4, the initial learning rate set to  
517 0.01, and the momentum and the decay both set to 0.99<sup>46</sup>. Images were resized to 299 x 299. We  
518 trained the detector on a machine with a 8-core Intel i7-6700K CPU, 32GB of RAM, and a 8GB  
519 GTX 1080 GPU. The model was trained for 288k iterations. A single instance of the forward  
520 pass took on average 15 ms.

521

522 We evaluated the models using the detection metric Intersection over Union (IoU). Thresholding  
523 the IoU defines matches between the ground truth and predicted boxes and allows computing  
524 precision-recall curves. The precision-recall curve at different threshold of IoU is shown in  
525 **Supplementary Fig. 7d**. In **Supplementary Table 2**, we report mean averaged precision (mAP)  
526 and recall (mAR).

527

### 528 **Pose estimation**

529 With the bounding box generated from the MSC-Multibox deep CNN, we wish to determine the  
530 precise pixel location of the keypoints that would describe the body features of the mouse. As a  
531 well established problem in computer vision, a good pose estimation system must be robust to  
532 occlusion, deformation, successful on rare and novel poses, invariant to changes in appearance  
533 from differences in lighting and backgrounds.

534  
535  
536  
537  
538  
539  
540  
541  
542  
543  
544  
545  
546  
547  
548  
549  
550  
551  
552  
553  
554  
555  
556  
557  
558  
559  
560  
561  
562  
563  
564  
565  
566  
567  
568  
569  
570  
571  
572  
573  
574  
575  
576  
577  
578  
579

The keypoints we chose are the nose, the ears, the neck, the body sides, and the base of the tail (**Supplementary Fig. 7b**). These features were chosen because they are best recognized regardless of the size of the animal, and one can deduce from them secondary features, such as orientation of the animal. We used Stacked Hourglass Network<sup>29</sup> to estimate the keypoints. This architecture has the capacity to learn all seven features and output pixel-level predictions. The output of the network is a set of heatmaps, one for each keypoint, representing the probability of the keypoint's presence every pixel (**Supplementary Fig. 7a**). We estimated the location of the keypoint by the maximum of its heatmap. A mean squared error (MSE) loss was used to compare the predicted heatmap to the ground truth.

During training, cropped frames with the mouse centered in the bounding box were resized to a resolution of 256 x 256. We also augmented the training data as follows ( $p$  is the probability of applying a type of augmentation):

- rotation with  $p = 1$ : angles were selected uniformly between  $0^\circ$  and  $180^\circ$
- translation
- horizontal and vertical flips
- scaling with  $p = 1$ : scaling factors were chosen from a pool of 0.10 to 0.65, uniformly
- color variation: adjusted brightness/contrast/gamma with  $p = 0.5$  in order to emulate the effects of poor lighting/setup
- Gaussian blur with  $p = 0.15$ : frames were blurred either by a  $\sigma = 1$  or  $\sigma = 2$  (chosen uniformly).
- Gaussian Noise added independently across image with  $p = 0.15$
- JPEG artifact with  $p = 0.15$ : added artifacts of JPEG compression onto the image

Extreme augmentations (with multiple types of augmentations) were examined to make sure that the transformed data looked reasonable. Using original and augmented keypoint annotations, we trained a pose estimator from scratch.

Training started from randomly initialized weights, and continued until validation accuracy plateaued, taking approximately 6 days. This training process was performed for 749k iterations. The network was trained using TensorFlow (Google) on a machine with 8-core Intel Xeon CPU, 24GB of RAM, and a 12GB Titan XP GPU. For optimization, we used RMPSPprop optimizer with momentum and decay both set to 0.99, batch size of 8 and a learning rate of 0.00025. We dropped the learning rate once by a factor of 5 after validation accuracy plateaus (after 33 epochs). Batch normalization was used to improve training.

Evaluation was done using the standard Percentage of Correct Keypoint (PCK) metric which reports the fraction of detections that fall within a distance of the ground truth<sup>29</sup>. More than 85% of the keypoints of the nose, ears, and neck are inferred within an error radius of 0.5 cm, and more than 80% of the keypoints of the body sides and tail lie within an error error radius of 1 cm (as a reference, the distance between two ears is  $\sim 3$  cm). The averaged PCK of all the seven keypoints is  $\sim 80\%$  within a radius of less than 0.5 cm (**Supplementary Fig. 7c**). Overall the system's performance can be characterized as high-human, significantly exceeding the typical annotator, but less precise than the absolute best possible.

## Supervised and unsupervised analysis of behavioral trajectories

580 From the pose estimation, we extracted two features to describe an animal's behavioral  
581 trajectories: the centroid was defined as the average position of the seven body landmarks; and  
582 the angular orientation of the line from the centroid to the nose. For each trial, these two features  
583 were extracted for  $n$  frames ( $n = 30$  (1 s) in most cases), thus the data dimension for each trial is  
584  $3n$  (the two centroid coordinates and the orientation).  
585

586 To determine whether the behavioral trajectories contain information about the decision  
587 categories, a support vector machine (SVM) with a linear kernel was trained for each decision  
588 category. The training set was labelled with the decision category based on information about the  
589 visual stimulus and the animal's choice (for example, "Stim: R, Choice: L" means that the light  
590 is on the right and the animal chooses the left port). Performance of the trained SVM was  
591 examined by prediction accuracy on the test set, and the F1 score, which is the harmonic mean of  
592 precision and recall:

$$593 \quad F_1 = 2 \cdot \frac{\textit{precision} \cdot \textit{recall}}{\textit{precision} + \textit{recall}} = \frac{2 \cdot \textit{true\_positive}}{2 \cdot \textit{true\_positive} + \textit{false\_positive} + \textit{false\_negative}} \quad (8)$$

594 The performance was computed as the average across 10 repeated analyses (**Supplementary**  
595 **Fig. 8**).  
596

597 We performed a non-linear embedding method, t-distributed stochastic neighbor embedding (t-  
598 SNE) analysis as previously described<sup>31,32</sup>. Briefly, the trajectory data of each trial were  
599 projected into a 2D t-SNE space. Point clouds on the t-SNE map represented candidate clusters.  
600 Density clustering identified these regions. We then plotted trajectories and reaction time  
601 distributions to confirm that the clusters were distinct from each other. A repository of the  
602 analysis scripts can be found in <https://github.com/tonyzhang25/MouseAcademyBehavior>.  
603

#### 604 **AUTHOR CONTRIBUTIONS**

605 M.Q. and M.M. designed the study; M.Q. and S.S. constructed the hardware setup and wrote the  
606 controlling software; M.Q. performed experiments and collected data for analysis; M.Q.  
607 developed the iterative generalized linear model with input from P.P. and M.M; C.S. developed  
608 the automated tracking software; T.Z. implemented animal tracking and behavioral trajectory  
609 analysis with input from M.Q., P.P. and M.M; M.Q. and M.M. wrote the manuscript with  
610 comments from all authors.  
611

#### 612 **ACKNOWLEDGEMENT**

613 We thank Joshua Sanders for technical assistance in incorporating Bpod into our system. We  
614 thank Ann Kennedy for insightful comments and suggestions on analysis of the behavioral  
615 trajectories. We thank Oisin Mac Adoha and Yuxin Chen for helpful comments and discussions.  
616 This work was supported by a grant from the Simons Foundation (SCGB 543015, M.M. and  
617 P.P.) and a postdoctoral fellowship from the Swartz Foundation (M.Q.).  
618

#### 619 **COMPETING FINANCIAL INTERESTS**

620 The authors declare no competing financial interests.  
621

#### 622 **DATA AVAILABILITY**

623 The datasets analyzed during the current study are available in  
624 <https://drive.google.com/open?id=1gkPbqGYKPGs7Rx1WNmubQW0dKyYE5YVR>

625

626 **REFERENCES**

- 627 1 Spear, N. E., Miller, J. S. & Jagielo, J. A. Animal memory and learning. *Annu Rev*  
628 *Psychol* **41**, 169-211, doi:10.1146/annurev.ps.41.020190.001125 (1990).
- 629 2 Branson, K., Robie, A. A., Bender, J., Perona, P. & Dickinson, M. H. High-throughput  
630 ethomics in large groups of *Drosophila*. *Nature methods* **6**, 451-457,  
631 doi:10.1038/nmeth.1328 (2009).
- 632 3 Honegger, K. & de Bivort, B. Stochasticity, individuality and behavior. *Current biology :  
633 CB* **28**, R8-R12, doi:10.1016/j.cub.2017.11.058 (2018).
- 634 4 Matzel, L. D. & Sauce, B. Individual differences: Case studies of rodent and primate  
635 intelligence. *J Exp Psychol Anim Learn Cogn* **43**, 325-340, doi:10.1037/xan0000152  
636 (2017).
- 637 5 Atkinson, J. W. & Raphelson, A. C. Individual differences in motivation and behavior in  
638 particular situations. *J Pers* **24**, 349-363 (1956).
- 639 6 Stern, E. Individual differences in the learning potential of human beings. *Npj Science of  
640 Learning* **2** (2017).
- 641 7 Luo, L., Callaway, E. M. & Svoboda, K. Genetic Dissection of Neural Circuits: A  
642 Decade of Progress. *Neuron* **98**, 865, doi:10.1016/j.neuron.2018.05.004 (2018).
- 643 8 Carandini, M. & Churchland, A. K. Probing perceptual decisions in rodents. *Nature  
644 neuroscience* **16**, 824-831, doi:10.1038/nn.3410 (2013).
- 645 9 Gomez-Marin, A., Paton, J. J., Kampff, A. R., Costa, R. M. & Mainen, Z. F. Big  
646 behavioral data: psychology, ethology and the foundations of neuroscience. *Nature  
647 neuroscience* **17**, 1455-1462, doi:10.1038/nn.3812 (2014).
- 648 10 Juavinett, A. L., Erlich, J. C. & Churchland, A. K. Decision-making behaviors: weighing  
649 ethology, complexity, and sensorimotor compatibility. *Current opinion in neurobiology*  
650 **49**, 42-50, doi:10.1016/j.conb.2017.11.001 (2018).
- 651 11 Schmitt, L. I. *et al.* Thalamic amplification of cortical connectivity sustains attentional  
652 control. *Nature* **545**, 219-223, doi:10.1038/nature22073 (2017).
- 653 12 Wimmer, R. D. *et al.* Thalamic control of sensory selection in divided attention. *Nature*  
654 **526**, 705-709, doi:10.1038/nature15398 (2015).
- 655 13 Akrami, A., Kopec, C. D., Diamond, M. E. & Brody, C. D. Posterior parietal cortex  
656 represents sensory history and mediates its effects on behaviour. *Nature* **554**, 368-372,  
657 doi:10.1038/nature25510 (2018).
- 658 14 Uchida, N. & Mainen, Z. F. Speed and accuracy of olfactory discrimination in the rat.  
659 *Nature neuroscience* **6**, 1224-1229, doi:10.1038/nn1142 (2003).
- 660 15 Scott, B. B., Brody, C. D. & Tank, D. W. Cellular resolution functional imaging in  
661 behaving rats using voluntary head restraint. *Neuron* **80**, 371-384,  
662 doi:10.1016/j.neuron.2013.08.002 (2013).
- 663 16 Busse, L. *et al.* The detection of visual contrast in the behaving mouse. *The Journal of  
664 neuroscience : the official journal of the Society for Neuroscience* **31**, 11351-11361,  
665 doi:10.1523/JNEUROSCI.6689-10.2011 (2011).
- 666 17 Poddar, R., Kawai, R. & Olveczky, B. P. A Fully Automated High-Throughput Training  
667 System for Rodents. *PloS one* **8**, doi:ARTN e83171  
668 10.1371/journal.pone.0083171 (2013).

- 669 18 Silasi, G. *et al.* Individualized tracking of self-directed motor learning in group-housed  
670 mice performing a skilled lever positioning task in the home cage. *Journal of*  
671 *Neurophysiology* **119**, 337-346, doi:10.1152/jn.00115.2017 (2018).
- 672 19 Erskine, A. B., T.; Herb, J. T.; Schaefer, A. AutoMouse: High throughput automated  
673 operant conditioning shows progressive behavioural impairment with graded olfactory  
674 bulb lesions. <https://www.biorxiv.org/content/early/2018/03/29/291815> (2018).
- 675 20 Crabbe, J. C., Wahlsten, D. & Dudek, B. C. Genetics of mouse behavior: interactions  
676 with laboratory environment. *Science* **284**, 1670-1672 (1999).
- 677 21 Hurst, J. L. & West, R. S. Taming anxiety in laboratory mice. *Nature methods* **7**, 825-  
678 826, doi:10.1038/nmeth.1500 (2010).
- 679 22 Daw, N. D. in *Decision Making, Affect, and Learning: Attention and Performance XXIII*  
680 (Oxford University Press, 2011).
- 681 23 Winter, Y. & Schaefer, A. T. A sorting system with automated gates permits individual  
682 operant experiments with mice from a social home cage. *J Neurosci Methods* **196**, 276-  
683 280, doi:10.1016/j.jneumeth.2011.01.017 (2011).
- 684 24 Daan, S. *et al.* Lab mice in the field: unorthodox daily activity and effects of a  
685 dysfunctional circadian clock allele. *J Biol Rhythms* **26**, 118-129,  
686 doi:10.1177/0748730410397645 (2011).
- 687 25 Hut, R. A., Pilorz, V., Boerema, A. S., Strijkstra, A. M. & Daan, S. Working for food  
688 shifts nocturnal mouse activity into the day. *PloS one* **6**, e17527,  
689 doi:10.1371/journal.pone.0017527 (2011).
- 690 26 Seidemann, E. Neuronal mechanisms mediating conversion of visual signals into  
691 perceptual decisions in a direction discrimination task. *Ph.D. dissertation, Stanford*  
692 *University.* (1998).
- 693 27 Burgess, C. P. *et al.* High-Yield Methods for Accurate Two-Alternative Visual  
694 Psychophysics in Head-Fixed Mice. *Cell Rep* **20**, 2513-2524,  
695 doi:10.1016/j.celrep.2017.08.047 (2017).
- 696 28 Erhan, D. S., D.; Toshev, A.; Anguelov, D. Scalable Object Detection using Deep Neural  
697 Networks. <https://arxiv.org/abs/1312.2249> (2014).
- 698 29 Newell, A. Y., K.; Deng, J. Stacked Hourglass Networks for Human Pose Estimation.  
699 <https://arxiv.org/abs/1603.06937> (2016).
- 700 30 Gris, K. V., Coutu, J. P. & Gris, D. Supervised and Unsupervised Learning Technology  
701 in the Study of Rodent Behavior. *Front Behav Neurosci* **11**, 141,  
702 doi:10.3389/fnbeh.2017.00141 (2017).
- 703 31 Berman, G. J., Choi, D. M., Bialek, W. & Shaevitz, J. W. Mapping the stereotyped  
704 behaviour of freely moving fruit flies. *J R Soc Interface* **11**, doi:10.1098/rsif.2014.0672  
705 (2014).
- 706 32 Todd, J. G., Kain, J. S. & de Bivort, B. L. Systematic exploration of unsupervised  
707 methods for mapping behavior. *Phys Biol* **14**, 015002, doi:10.1088/1478-  
708 3975/14/1/015002 (2017).
- 709 33 Botvinick, M. M., Braver, T. S., Barch, D. M., Carter, C. S. & Cohen, J. D. Conflict  
710 monitoring and cognitive control. *Psychol Rev* **108**, 624-652 (2001).
- 711 34 Sorge, R. E. *et al.* Olfactory exposure to males, including men, causes stress and related  
712 analgesia in rodents. *Nature methods* **11**, 629-632, doi:10.1038/nmeth.2935 (2014).
- 713 35 Barnes, C. A. Memory deficits associated with senescence: a neurophysiological and  
714 behavioral study in the rat. *J Comp Physiol Psychol* **93**, 74-104 (1979).



- 715 36 Olton, D. S., Walker, J. A. & Gage, F. H. Hippocampal connections and spatial  
716 discrimination. *Brain Res* **139**, 295-308 (1978).
- 717 37 Aoki, R., Tsubota, T., Goya, Y. & Benucci, A. An automated platform for high-  
718 throughput mouse behavior and physiology with voluntary head-fixation. *Nat Commun* **8**,  
719 1196, doi:10.1038/s41467-017-01371-0 (2017).
- 720 38 Shalev-Shwartz, S. Online Learning and Online Convex Optimization. *Foundations and*  
721 *Trends in Machine Learning* **4**, 107-194 (2012).
- 722 39 Piech, C. S., J.; Huang, J.; Ganguli, S.; Sahami, M.; Guibas, L.; Sohl-Dickstein, J. Deep  
723 Knowledge Tracing. <https://arxiv.org/abs/1506.05908> (2015).
- 724 40 Hong, W. *et al.* Automated measurement of mouse social behaviors using depth sensing,  
725 video tracking, and machine learning. *Proc Natl Acad Sci U S A* **112**, E5351-5360,  
726 doi:10.1073/pnas.1515982112 (2015).
- 727 41 Egnor, S. E. & Branson, K. Computational Analysis of Behavior. *Annu Rev Neurosci* **39**,  
728 217-236, doi:10.1146/annurev-neuro-070815-013845 (2016).
- 729 42 Wiltschko, A. B. *et al.* Mapping Sub-Second Structure in Mouse Behavior. *Neuron* **88**,  
730 1121-1135, doi:10.1016/j.neuron.2015.11.031 (2015).
- 731 43 Szuts, T. A. *et al.* A wireless multi-channel neural amplifier for freely moving animals.  
732 *Nature neuroscience* **14**, 263-269, doi:10.1038/nn.2730 (2011).
- 733 44 Ziv, Y. *et al.* Long-term dynamics of CA1 hippocampal place codes. *Nature*  
734 *neuroscience* **16**, 264-266, doi:10.1038/nn.3329 (2013).
- 735 45 Szegedy, S. I., S.; Vanhoucke, V.; Alemi, A. Inception-v4, Inception-ResNet and the  
736 Impact of Residual Connections on Learning. <https://arxiv.org/abs/1602.07261> (2016).
- 737 46 Ruder, S. An overview of gradient descent optimization algorithms.  
738 <https://arxiv.org/abs/1609.04747> (2017).  
739

# Figure 1

bioRxiv preprint doi: <https://doi.org/10.1101/467878>; this version posted November 16, 2018. The copyright holder for this preprint (which was not certified by peer review) is the author/funder. All rights reserved. No reuse allowed without permission.

a

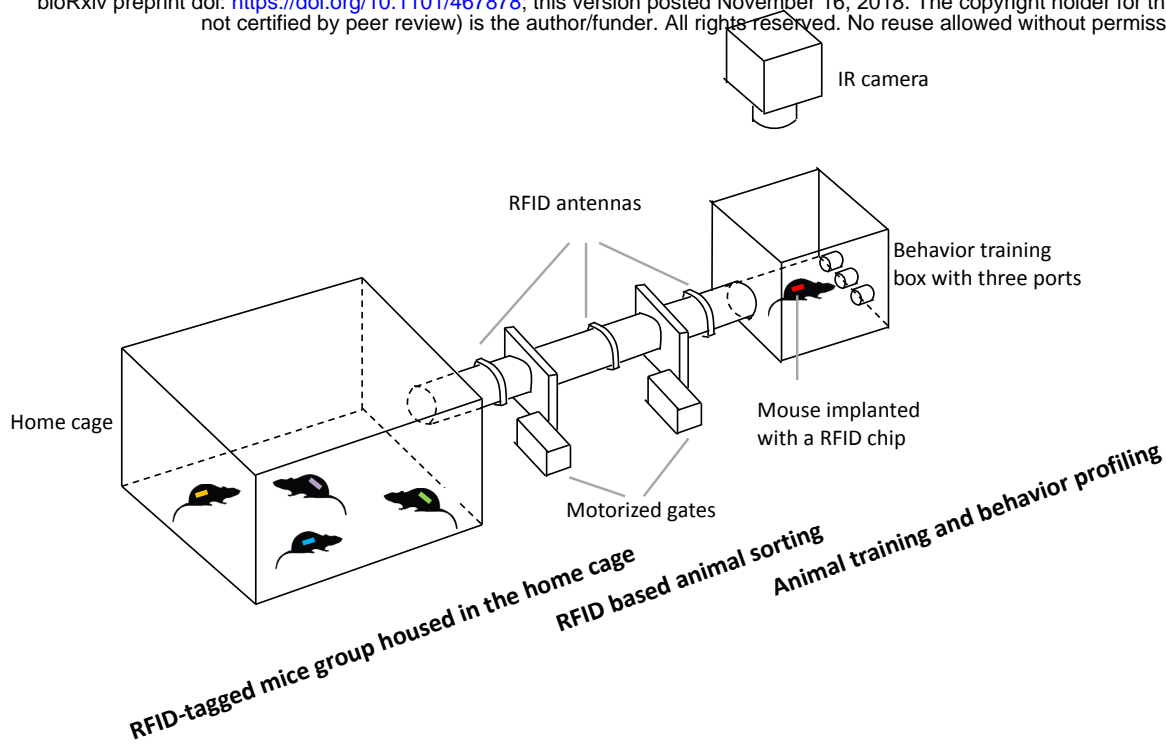

b

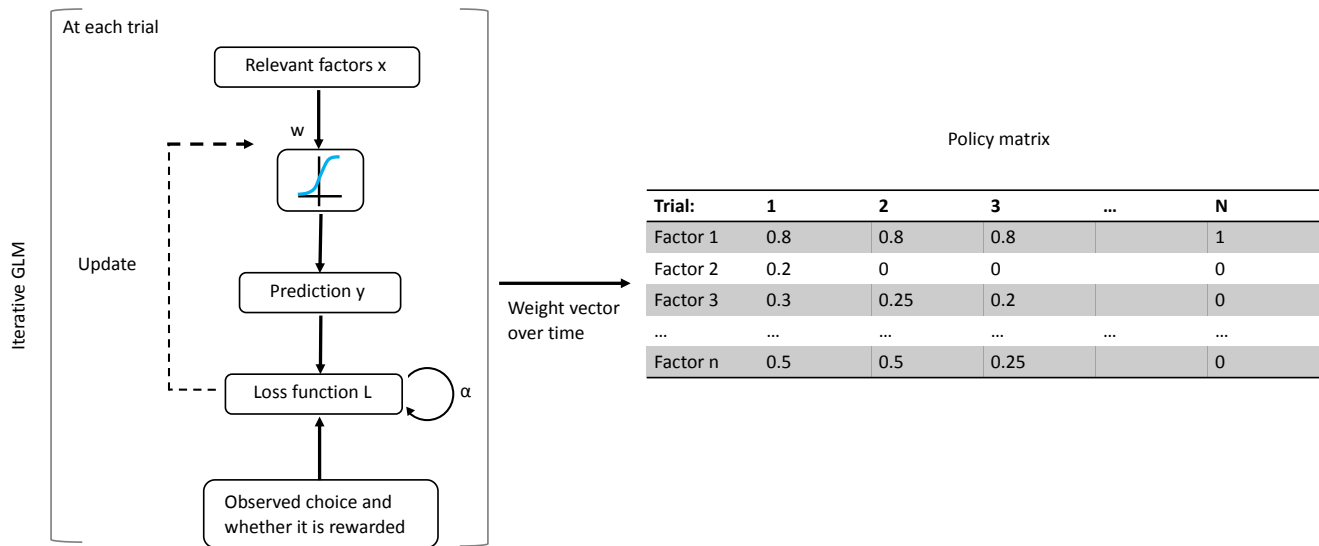

c

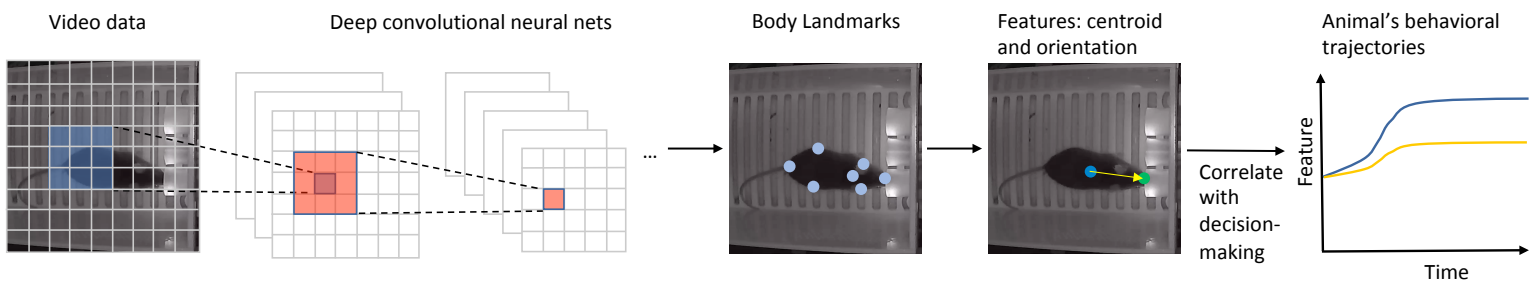

741 **Fig. 1: Components of Mouse Academy**

742 **(a)** An automated RFID sorting and animal training system. Mice implanted with RFID chips are  
743 group-housed in the home cage. The RFID sorting system identifies each mouse by its implanted  
744 chip. One animal at a time gains access to a behavioral training box. As the animal learns a task,  
745 its decision sequences and video recordings are acquired. **(b)** An iterative generalized linear  
746 model. For each trial, the model predicts the animal's choice based on the relevant factors and  
747 then evaluates the difference from the actual choice. This difference, after temporal weighting, is  
748 fed back to the loss function, which gets minimized by updating the weights of the input factors.  
749 The model produces a policy matrix in which the rows indicate the weights of the relevant  
750 factors and the columns are the trials. **(c)** An automated behavior assessment program using deep  
751 convolutional neural networks to extract the location and pose information of an animal.

# Figure 2

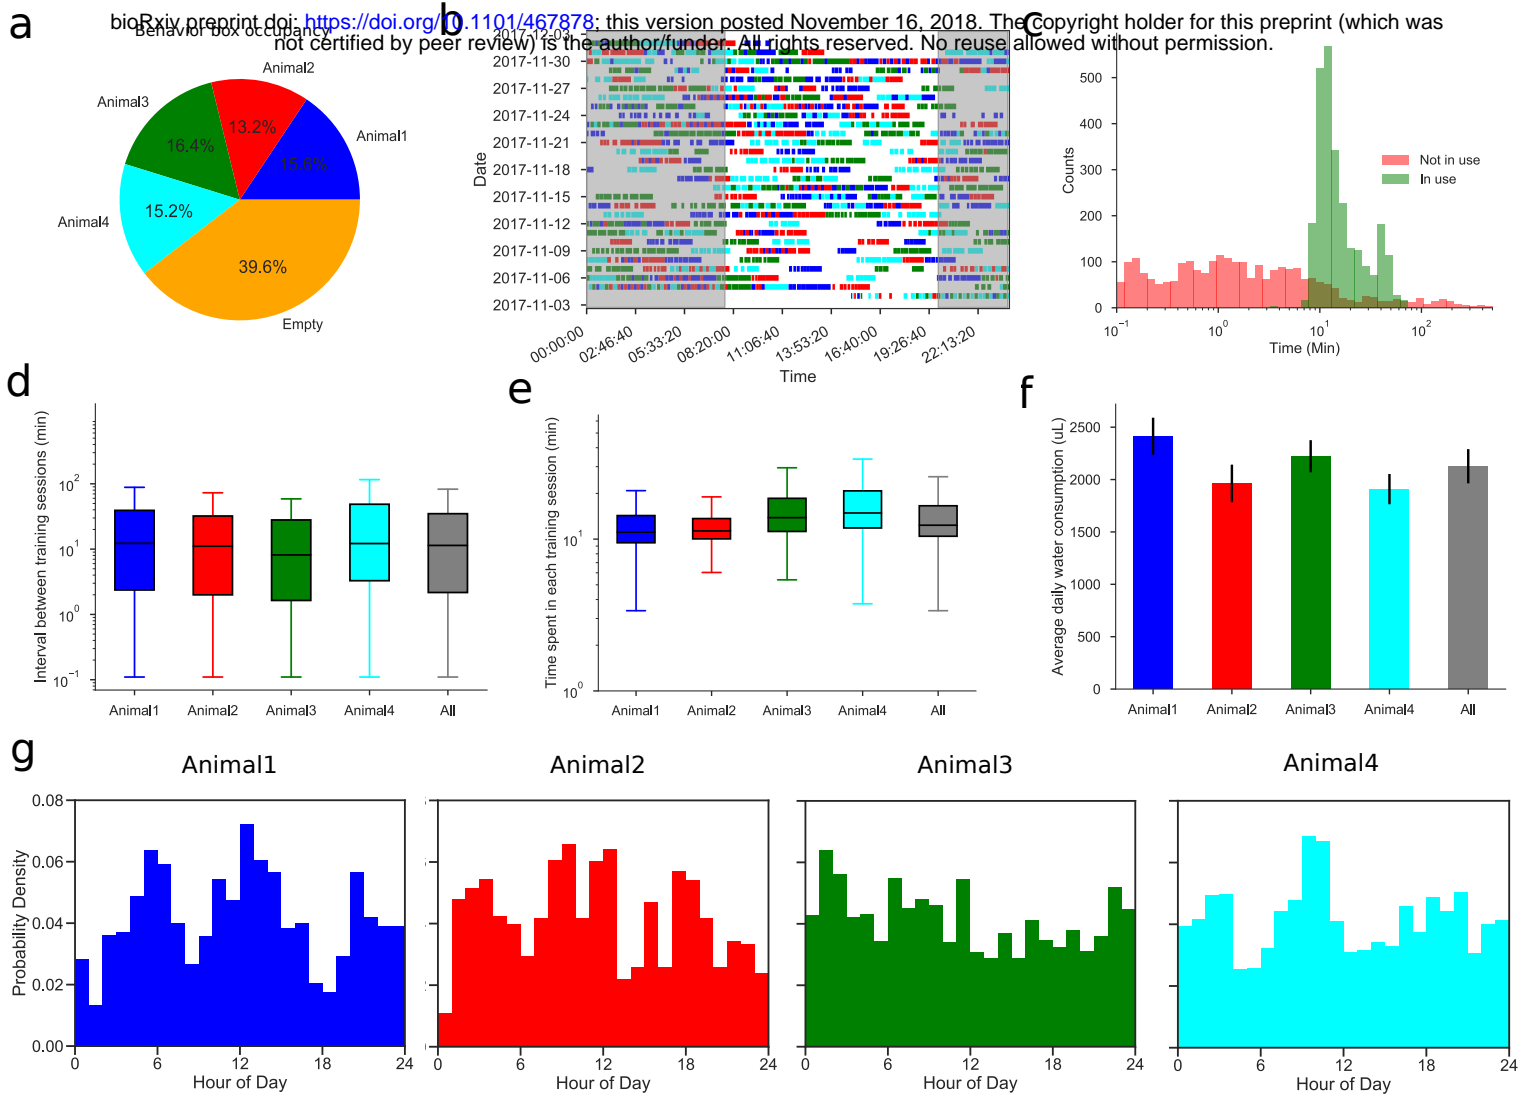

752 **Fig. 2: Performance of the automated training system on a sample cohort**  
753 **(a)** Fraction of time the behavior box was occupied by each of the four animals. **(b)** Activity  
754 trace of each animal in the behavior box for the entire training period of 28 days. Shadow  
755 indicates the dark cycle from 8pm to 8am. **(c)** Distribution of time intervals during which the  
756 behavior box is occupied or empty. **(d)** Box plot of intervals between each animal's sessions  
757 (median, quartiles, and range). **(e)** Box plot of the time spent in a session for each animal. **(f)**  
758 Averaged daily water consumption of each animal. Error bars indicate standard errors. **(g)**  
759 Circadian histograms of each animal's activity in the behavior box.

# Figure 3

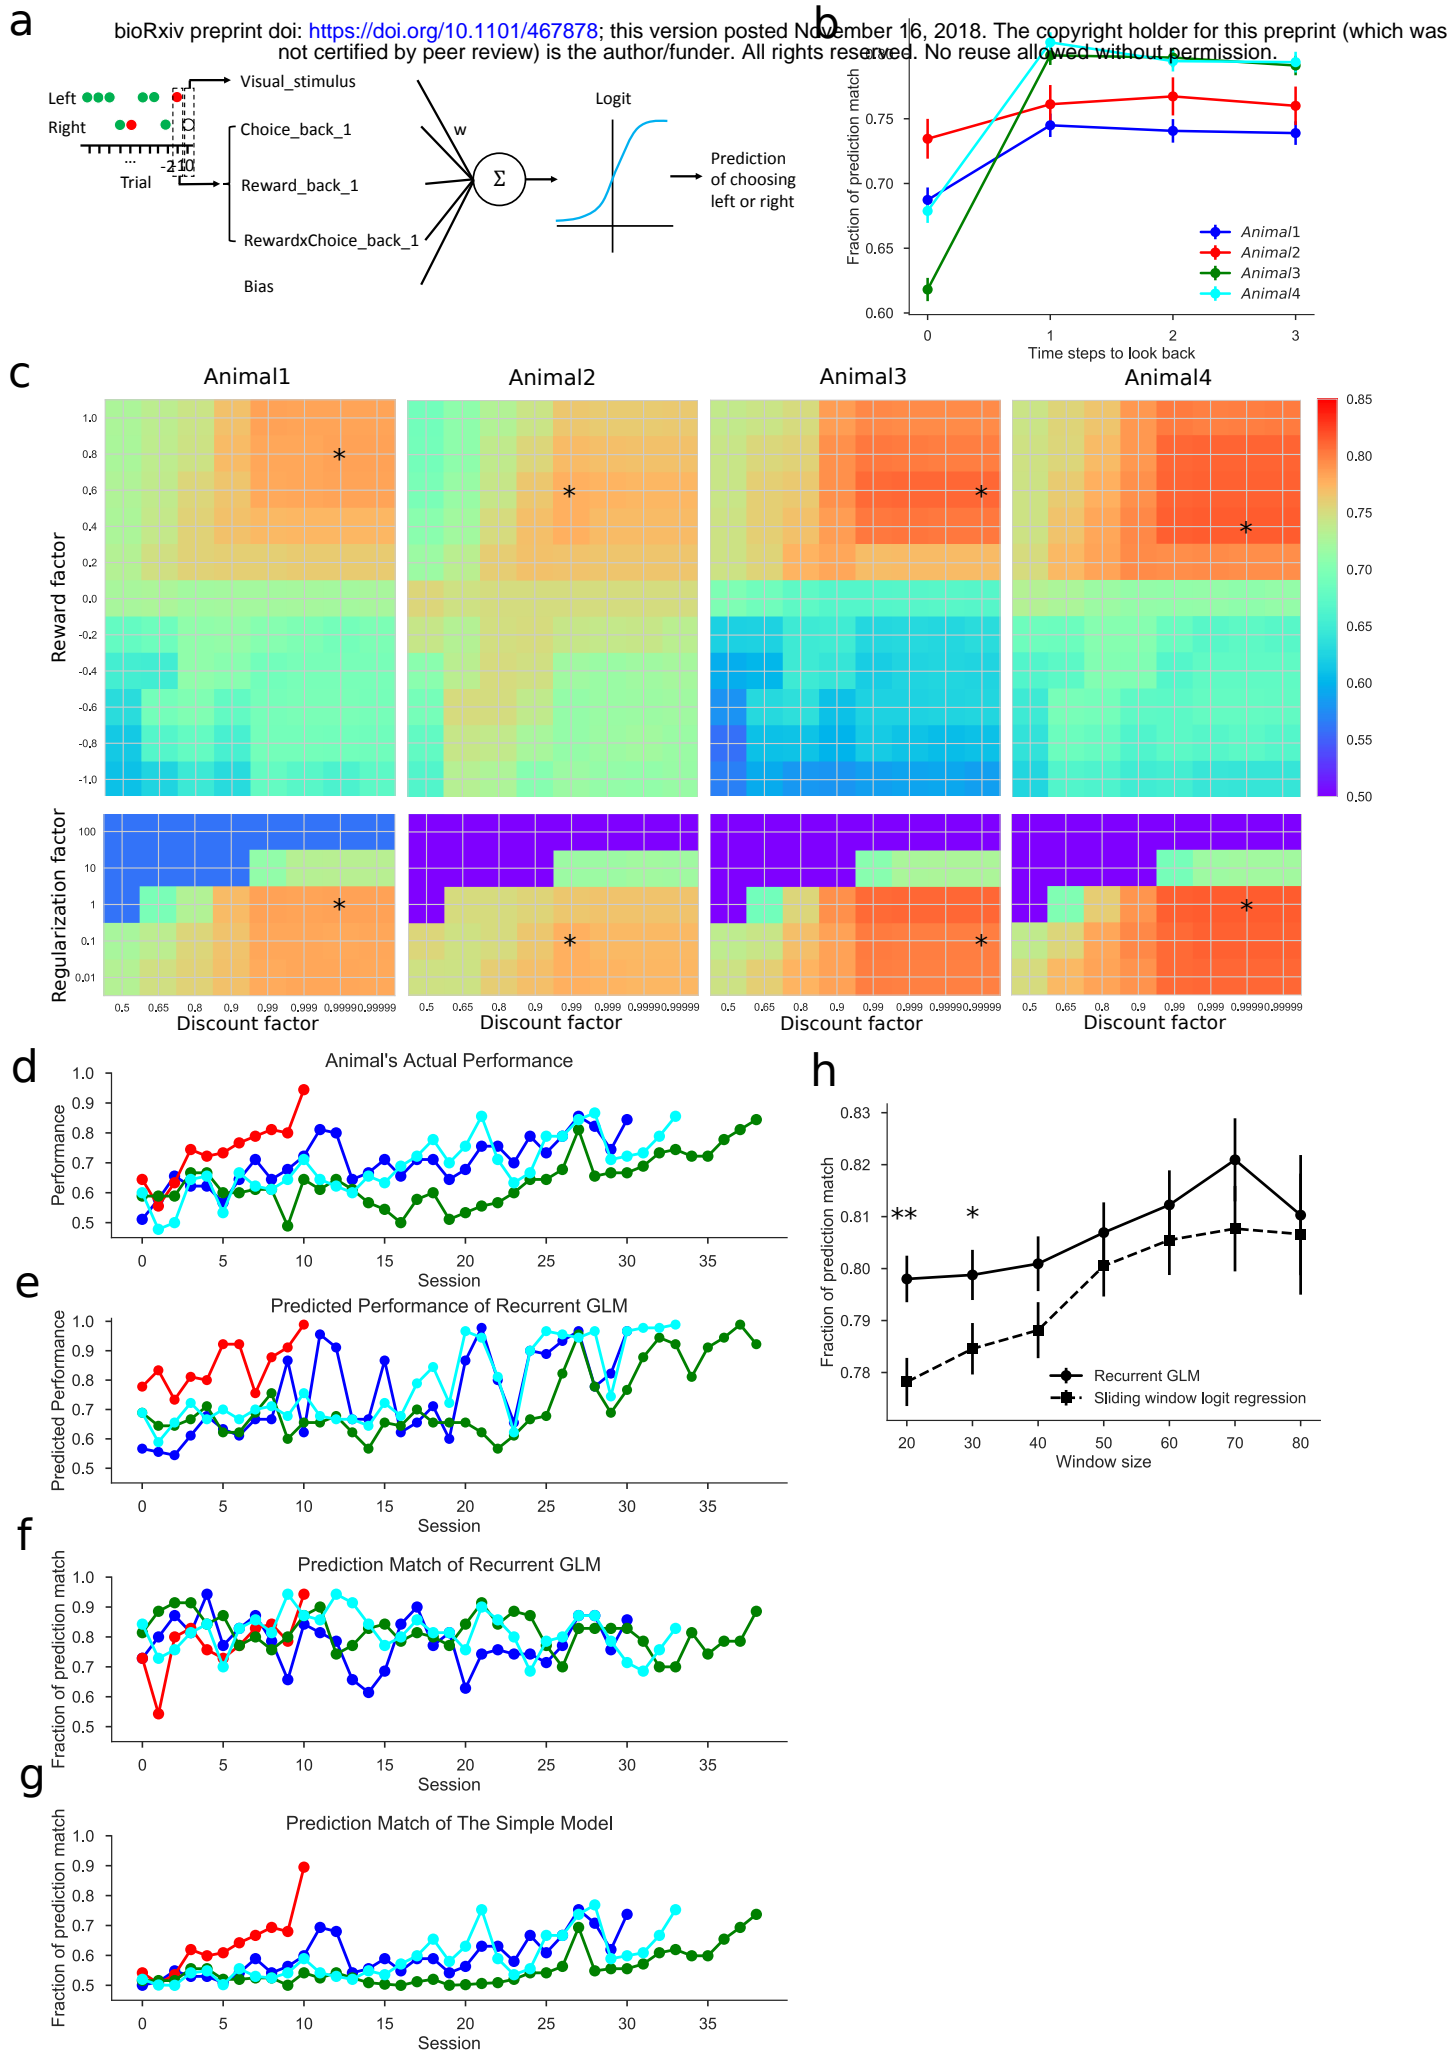

760 **Fig. 3: Iterative generalized linear model and its prediction accuracy**  
761 **(a)** Illustration of the GLM as applied to a visual discrimination task. The model's prediction is  
762 based on the output of a logistic function whose input is the weighted sum of a visual stimulus  
763 term, a bias term, and three history-dependent terms. The stimulus can be on the left or right and  
764 the choice can be rewarded (consistent with the stimulus, indicated by a green dot) or  
765 unrewarded (opposite to the stimulus, indicated by a red dot). **(b)** Selection of the history-  
766 dependent terms based on the model prediction accuracy. Error bars indicate standard errors. **(c)**  
767 Hyperparameters for each of the animals: reward factor, discount factor, and regularization factor.  
768 The optimal values are marked with a star. **(d)** The actual performance of each animal over time  
769 in the visual task. **(e)** Performance as predicted by the GLM. **(f)** Fraction of choices predicted  
770 correctly by the GLM. **(g)** Fraction of choices predicted correctly by a simple model based on the  
771 animal's average performance in the task. **(h)** Fraction of predictions matched by the iterative  
772 GLM and the sliding window logistic regression model. Error bars indicate standard errors. \*\*, \*  
773 indicate  $P < 0.01$ ,  $0.05$ . Random prediction would give 50% match.

Figure 4

a

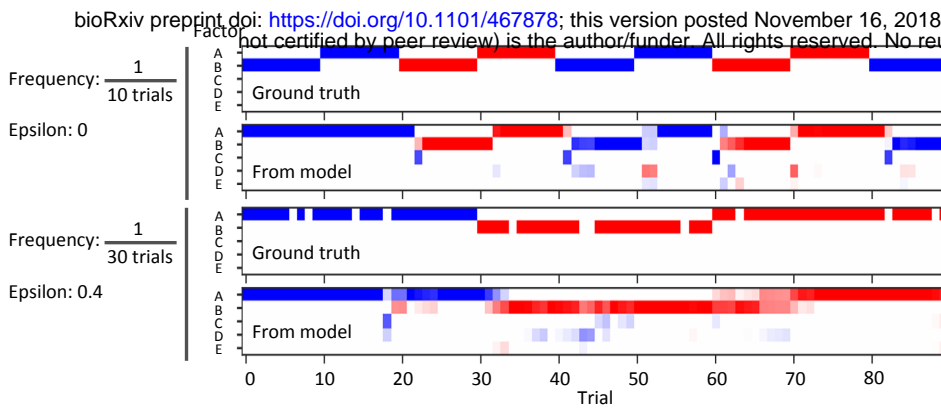

b

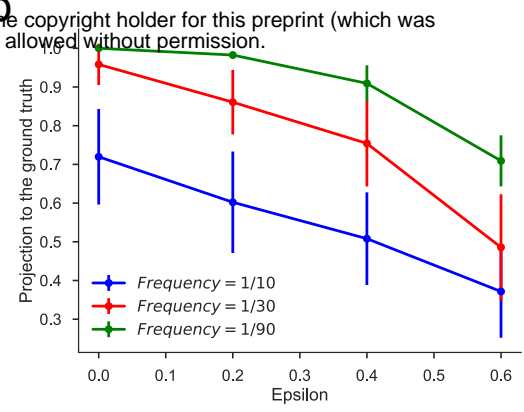

c

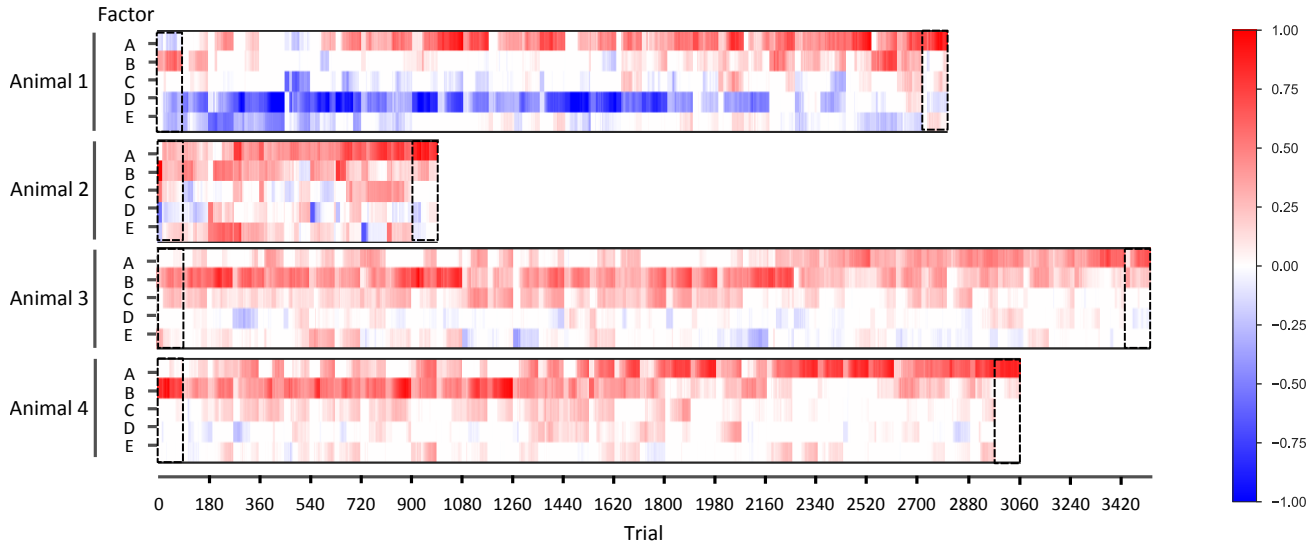

d

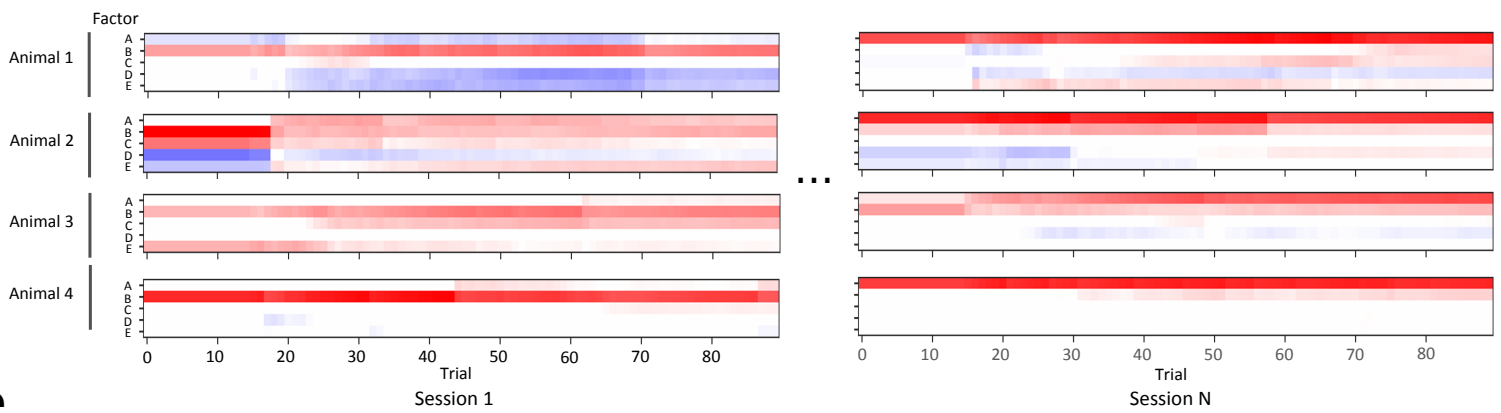

e

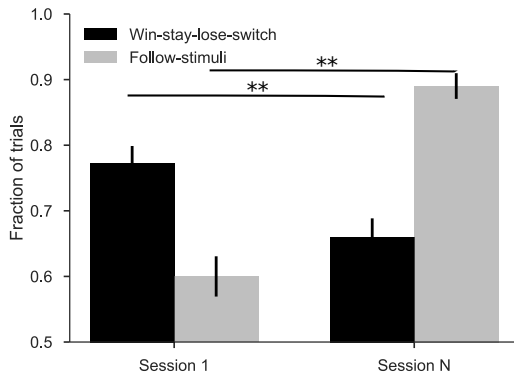



774 **Fig. 4: Interpretation of policies during learning**

775 **(a)** Policy vectors recovered by the iterative GLM capture the ground truth policies. The policy  
776 matrix plots in each trial (horizontal) the weights associated with each of 5 factors (vertical),  
777 encoded with a color scale (see panel c). The factors are: A = Visual\_stimulus, B =  
778 Choice×Reward\_back\_1, C = Choice\_back\_1, D = Reward\_back\_1, E = Bias. Two examples  
779 are shown of ground truth policies used to simulate data and the corresponding trial-by-trial  
780 estimates from the GLM. Blanks in the ground truth matrix indicate instances where the  
781 simulated choice is opposite to the policy. **(b)** Similarity between the recovered policy and the  
782 ground truth, measured by the cosine between the two policy vectors. Error bars indicate  
783 standard deviation. **(c)** Policy matrices recovered for the four animals show distinct individual  
784 learning processes. Dashed rectangles highlight the first and last sessions of each animal, as  
785 enlarged in **d**. **(d)** Recovered policy matrices for the first and last sessions of each animal. **(e)**  
786 Fraction of trials explained by two candidate policies (win-stay-lose-switch and following the  
787 stimuli) in the first and last sessions. Error bars indicate standard errors. \*\* indicates  $P < 0.01$ .

Figure 5

a

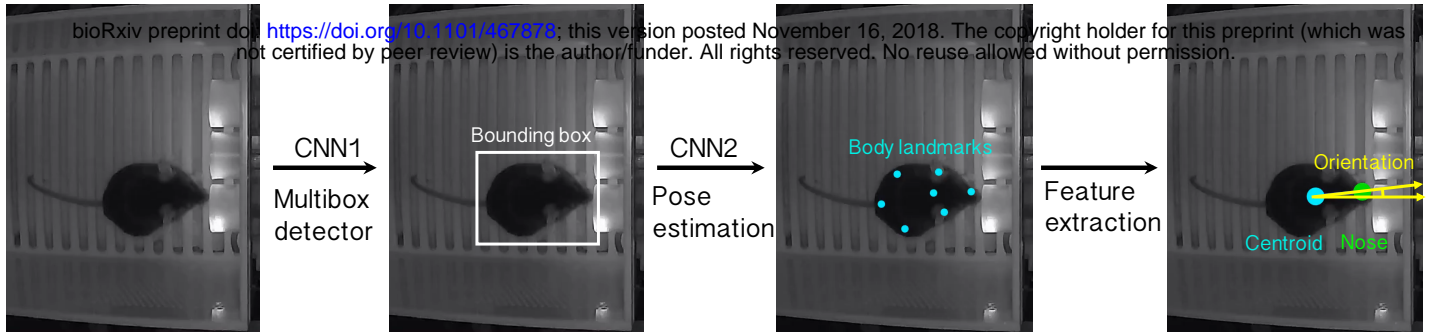

b

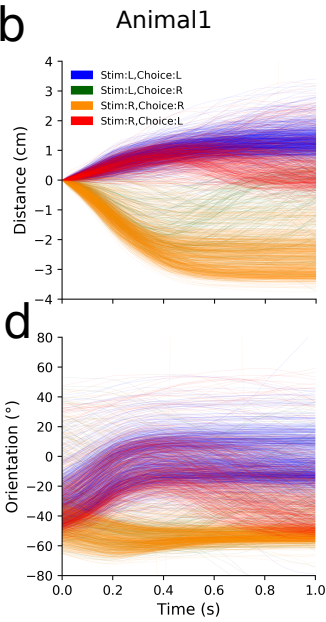

c

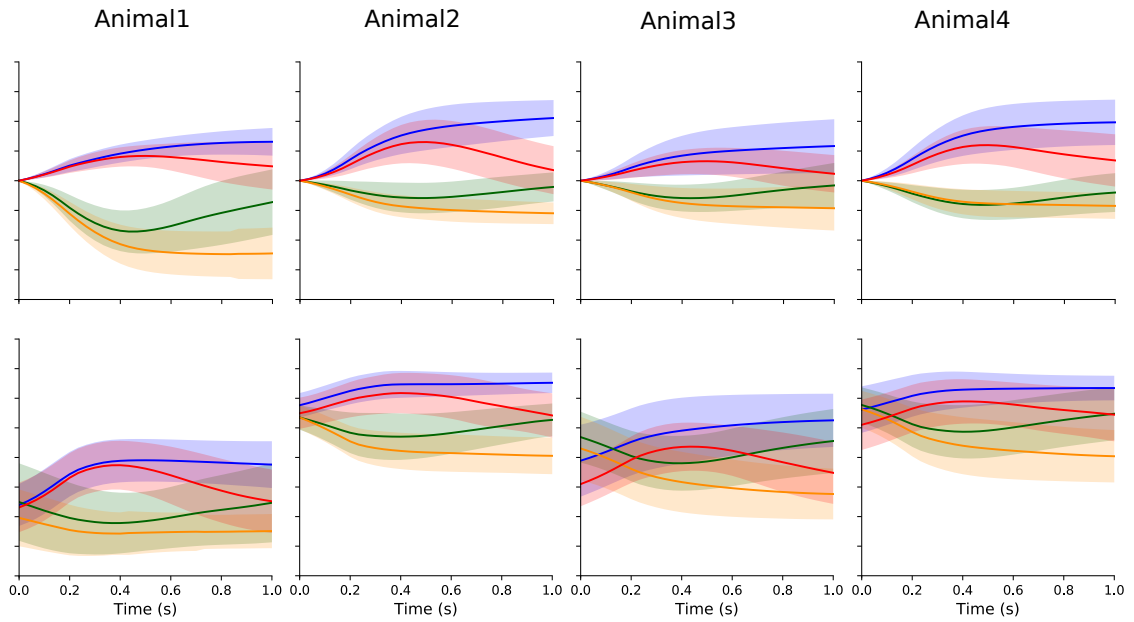

d

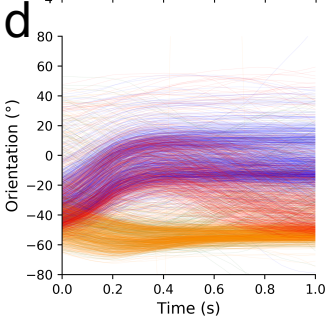

e

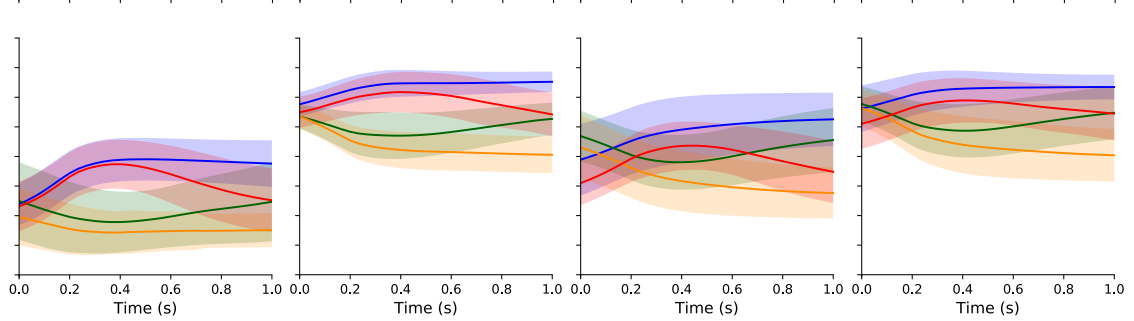

788 **Fig. 5: Supervised analysis using features extracted by automated behavior assessment**  
789 **(a)** Two deep convolutional neural networks (CNNs) extract relevant features of mouse  
790 behavior. The first CNN generates for each video frame a bounding box that encloses the animal.  
791 The second CNN operates on the bounding box and generates seven body landmarks for nose,  
792 ears, neck, body sides, and tail. The centroid is the average of the seven body landmarks and the  
793 orientation is the angle between the horizontal axis and the line connecting the centroid and the  
794 nose. **(b)** Centroid distance along the left-right axis vs time during the movement, for animal 1.  
795 The starting position is set to zero, positive values indicate movement to the left, negative to the  
796 right. The 4 trial types are indicated by different colors. **(c)** Average centroid trajectory for each  
797 animal. Shaded region indicates standard error. **(d-e)** Orientation vs time, displayed as in panels  
798 b-c. Positive angle points to the left, negative to the right.

# Figure 6

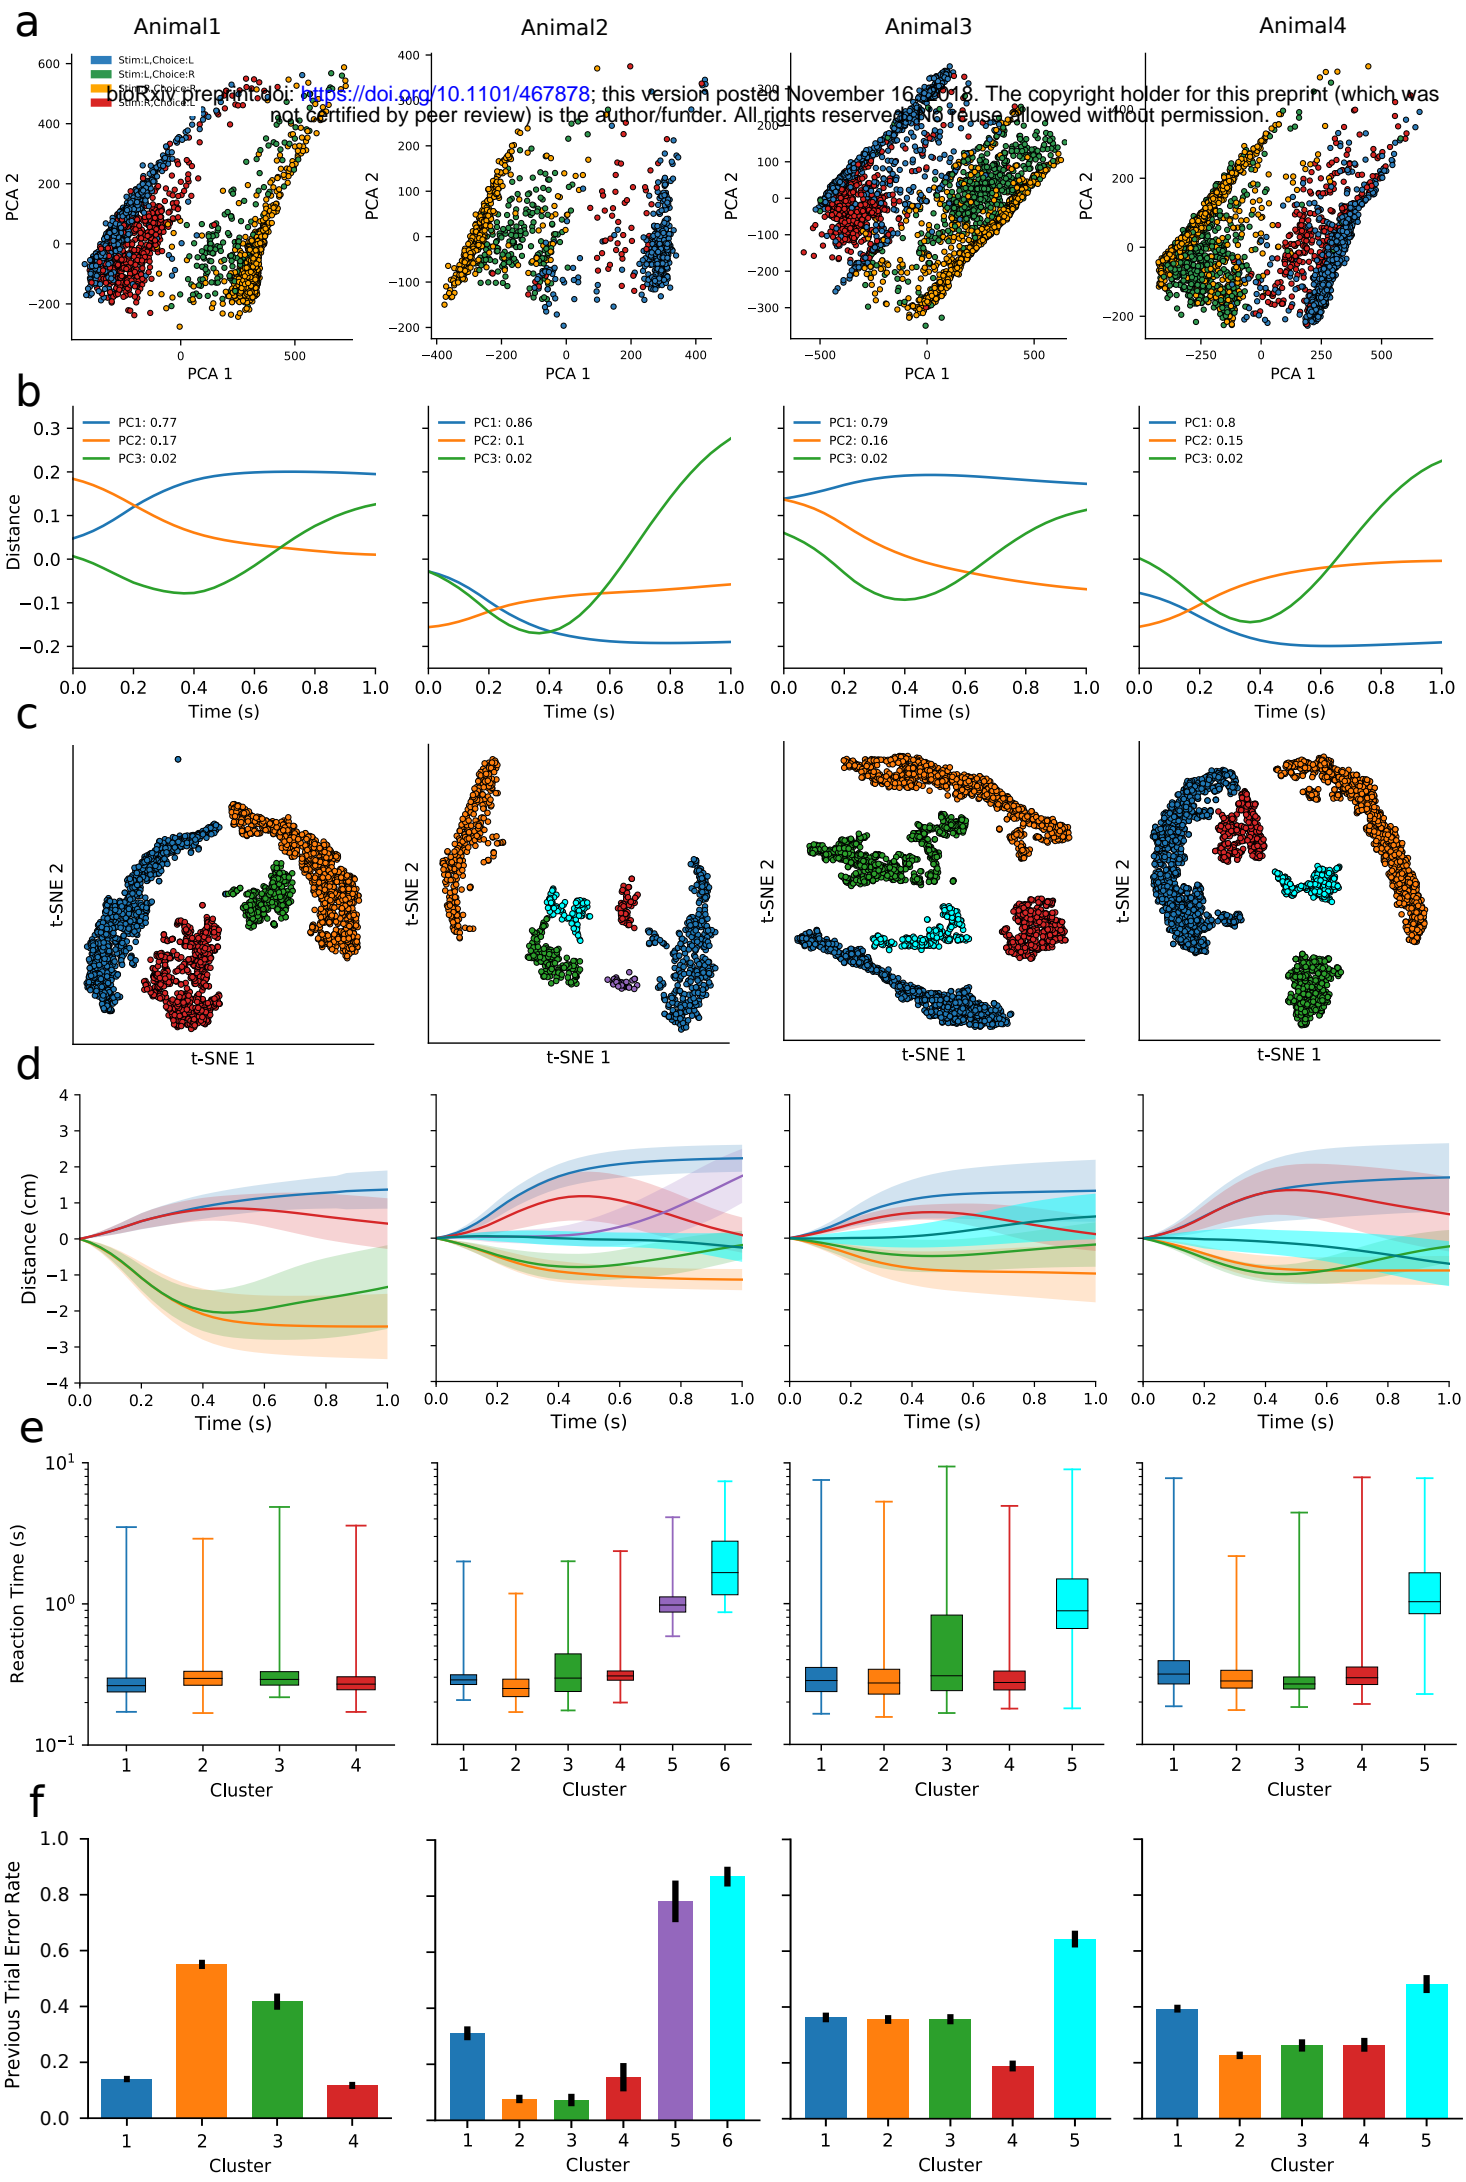

799 **Fig. 6: Unsupervised analysis of the behavior trajectories**  
800 **(a)** Principal component projections onto PC1 and PC2 of the centroid-vs-time trajectories from  
801 Fig 5. The 4 trial types are indicated by different colors. **(b)** The centroid trajectories  
802 corresponding to the first three principal components (PCs). The variance explained by each PC  
803 is shown in the plot legend. **(c)** Clustering trials by their trajectories using t-SNE analysis.  
804 Distinct clusters are marked with different colors for use in subsequent panels. **(d)** Averaged  
805 centroid distance vs time for each cluster, plotted as in Fig 5b. **(e)** Box plot of the reaction time  
806 for each cluster. **(f)** The error rate on the preceding trial for each cluster. Error bars indicate  
807 standard errors.

1 **Supplementary Materials**

2

3 **Supplementary Table 1. Cost Analysis of Mouse Academy Hardware**

4 **PC version**

| <b>Parts</b>                                                                 | <b>Quantity</b> | <b>Supplier</b>                    | <b>Cost</b> |
|------------------------------------------------------------------------------|-----------------|------------------------------------|-------------|
| Bpod State Machine                                                           | 1               | Sanworks                           | \$495.00    |
| Custom behavior box (Plastic, ports with LEDs and photo-gates, valves, etc.) | 1               | Port breakout boards from Sanworks | \$500.00    |
| IR Webcam                                                                    | 1               | Ailipu Technology                  | \$47.99     |
| Custom light- and sound-proof chamber                                        | 1               | NA                                 | \$75.00     |
| Arduino Mega 2560 R3                                                         | 1               | Sparkfun                           | \$45.95     |
| RFID Reader ID-12LA                                                          | 3               | Sparkfun                           | \$29.95     |
| Servo - Generic                                                              | 2               | Sparkfun                           | \$8.95      |
| Custom tunnel (Plastic, holders, antennas etc.)                              | 1               | NA                                 | \$150.00    |
| Engineered home cage                                                         | 1               | Caltech animal facility            | \$76.10     |
| PC                                                                           | 1               | Hewlett-Packard                    | \$1000.00   |
| <b>Total cost</b>                                                            |                 |                                    | \$2428.94   |

5

6 **Raspberry Pi version**

| <b>Parts</b>                                                                 | <b>Quantity</b> | <b>Supplier</b>                    | <b>Cost</b> |
|------------------------------------------------------------------------------|-----------------|------------------------------------|-------------|
| Bpod State Machine                                                           | 1               | Sanworks                           | \$495.00    |
| Custom behavior box (Plastic, ports with LEDs and photo-gates, valves, etc.) | 1               | Port breakout boards from Sanworks | \$500.00    |
| OpenMV Camera M7                                                             | 1               | OpenMV                             | \$65.00     |
| Custom light- and sound-proof chamber                                        | 1               | NA                                 | \$75.00     |
| Arduino Mega 2560 R3                                                         | 1               | Sparkfun                           | \$45.95     |
| RFID Reader ID-12LA                                                          | 3               | Sparkfun                           | \$29.95     |
| Servo - Generic                                                              | 2               | Sparkfun                           | \$8.95      |
| Custom tunnel (Plastic, holders, antennas etc.)                              | 1               | NA                                 | \$150.00    |
| Engineered home cage                                                         | 1               | Caltech animal facility            | \$76.10     |
| Raspberry Pi 3 Model B                                                       | 1               | Raspberry Pi                       | \$35.10     |
| <b>Total cost</b>                                                            |                 |                                    | \$1481.05   |

7

8 **Supplementary Table 2: mean averaged precision (mAP) and recall (mAR) at different**  
9 **threshold of Intersection over Union (IoU) (related to mouse detection)**

|                     | mAP  | mAR  |
|---------------------|------|------|
| $0.75 < IoU < 0.95$ | 0.81 | 0.82 |
| $IoU = 0.5$         | 0.99 | 0.99 |
| $IoU = 0.75$        | 0.95 | 0.98 |

10

# Supplementary Figure 1

**a**

bioRxiv preprint doi: <https://doi.org/10.1101/467838>; this version posted November 16, 2018. The copyright holder for this preprint (which was not certified by peer review) is the author/funder. All rights reserved. No reuse allowed without permission.

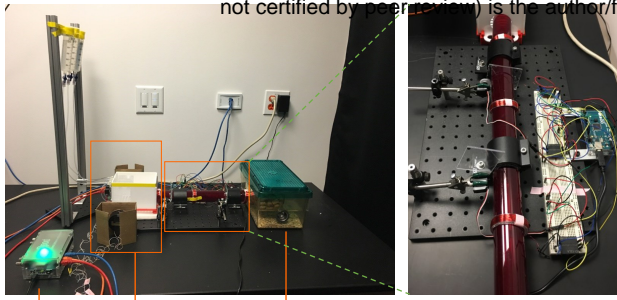

Bpod Training box Engineered home cage

**b**

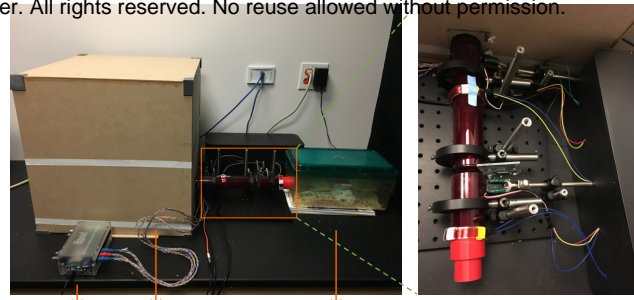

Bpod Light/sound proof box Engineered home cage

**c**

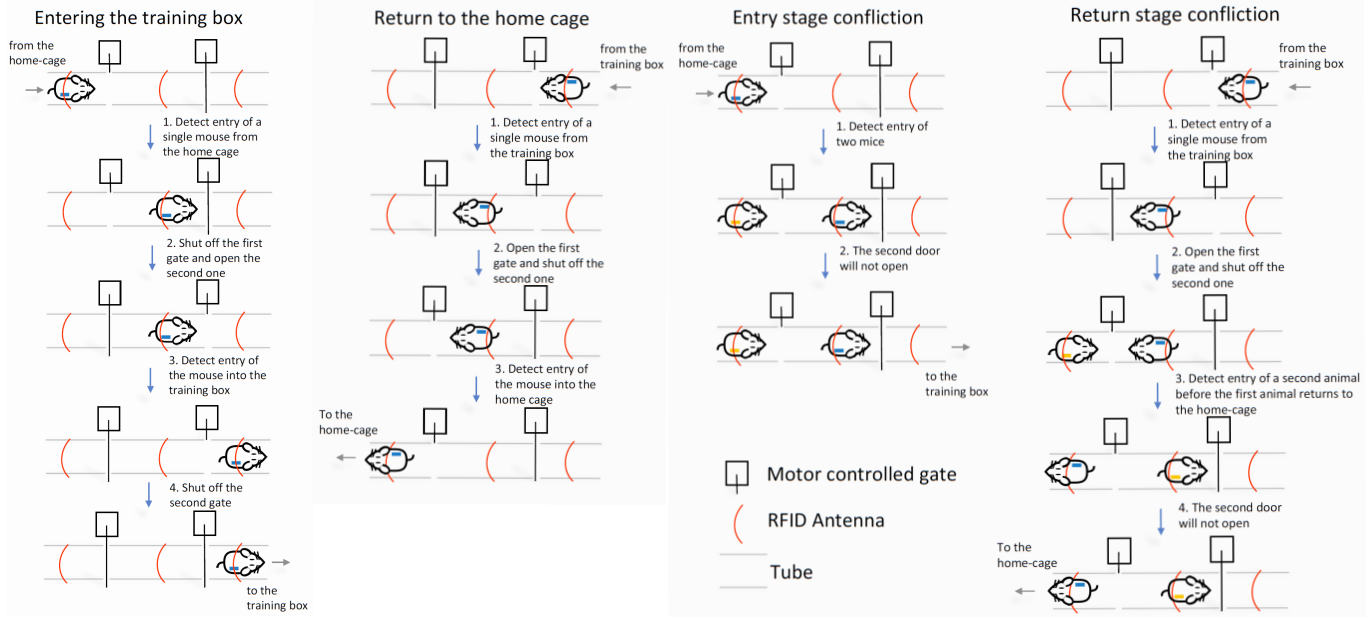

**d**

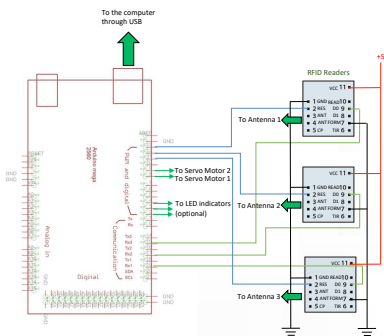

**e**

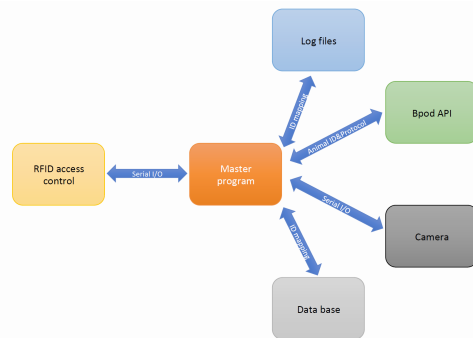

**f**

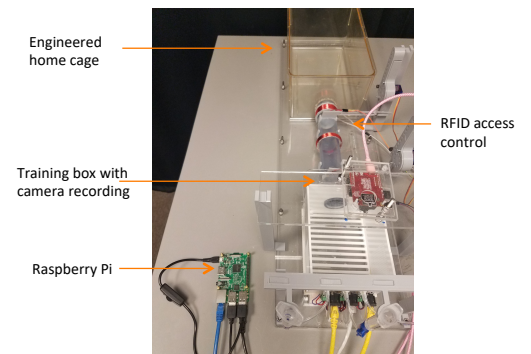



11 **Supplementary Fig. 1: Technical details of the hardware design**

12 **(a-b)** Side view of the setup **(a)** packed into a light- and sound-proof box **(b)**. **(c)** RFID sorting  
13 process. For an animal to enter the behavior box, only when the left and the middle detectors  
14 detect the same RFID chip, the left gate is closed and the right gate is open so that the animal can  
15 access the behavior box. For an animal to return to the home cage, only when the right and the  
16 middle detectors detect the same RFID chip, the right gate is closed and the left gate is open so  
17 that the animal can go back to the home cage. In the entry and the return processes, if the left and  
18 the middle detectors detect different RFID chips, the animals have to leave the tube and the  
19 detectors get reset afterwards. **(d)** Schematic of RFID access control circuit. **(e)** Schematic of the  
20 software controlling the devices. A master program receives input from the RFID sorting device  
21 and controls four other modules including Bpod, synchronized video recording, data  
22 management, and logging. **(f)** Top view of a Raspberry Pi version of the setup.

# Supplementary Figure 2

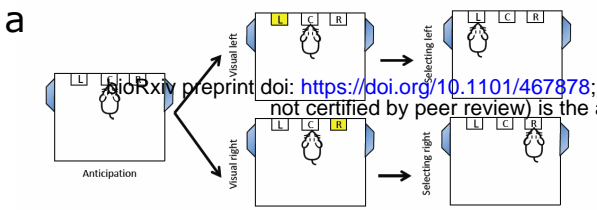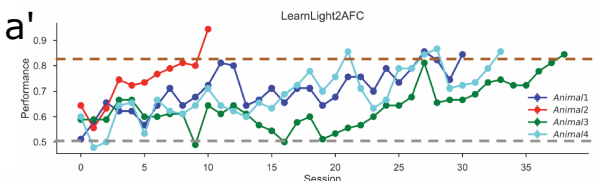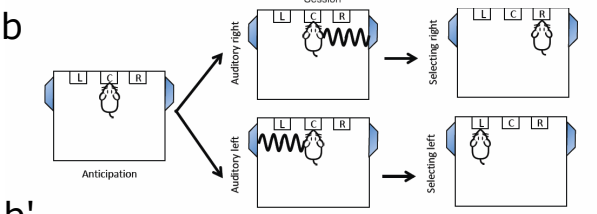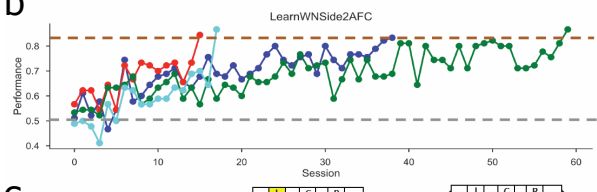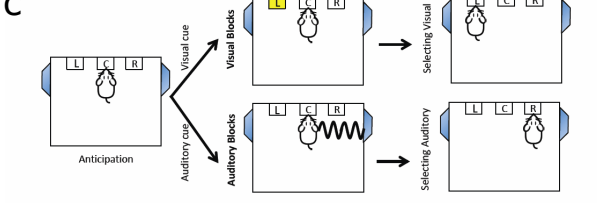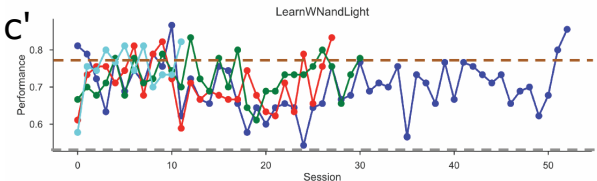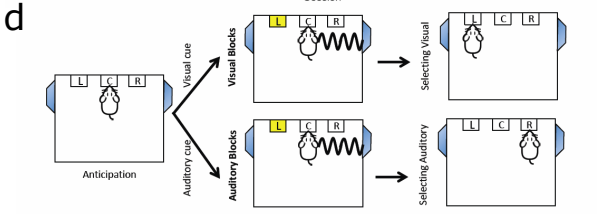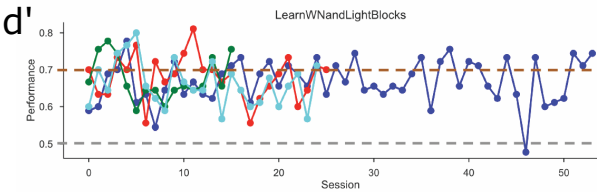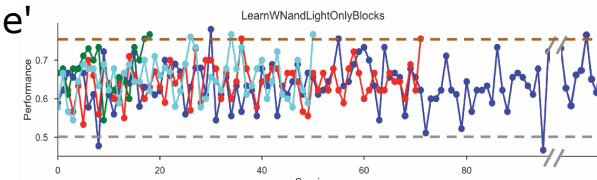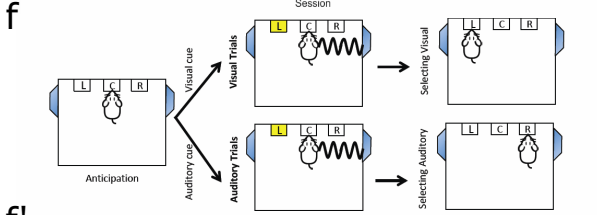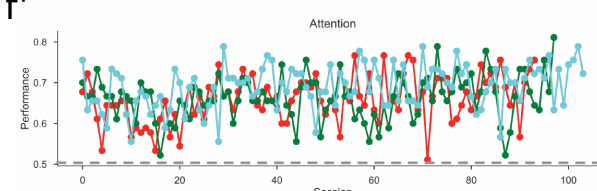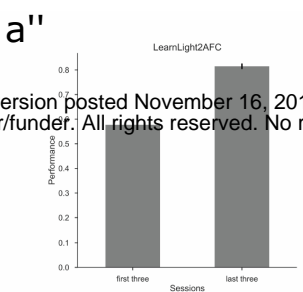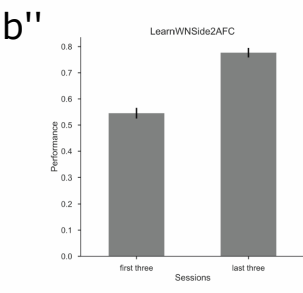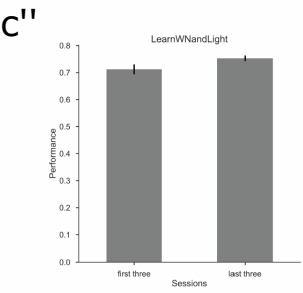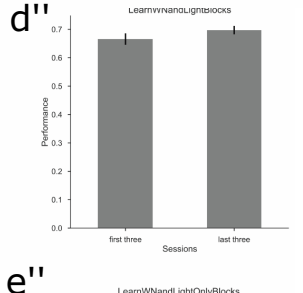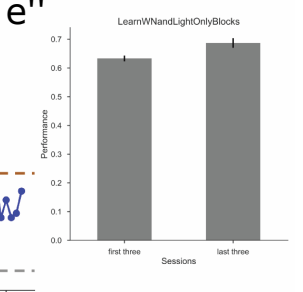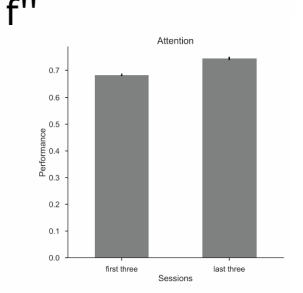

bioRxiv preprint doi: <https://doi.org/10.1101/467878>; this version posted November 16, 2018. The copyright holder for this preprint (which was not certified by peer review) is the author/funder. All rights reserved. No reuse allowed without permission.

23 **Supplementary Fig. 2: Illustration of training procedures**

24 Training proceeds through six stages (Online methods). The design, learning curves, and animal  
25 performance of the simple visual task (**a**, **a'**, **a''**), the simple auditory task (**b**, **b'**, **b''**), the cued  
26 single-modality (visual or auditory) switching task (**c**, **c'**, **c''**), the cued single- (visual or  
27 auditory) and double-modality (attend to vision or audition) switching task (**d**, **d'**, **d''**), the cued  
28 double-modality (attend to vision or audition) switching task (**e**, **e'**, **e''**), and the final selective  
29 attention task (**f**, **f'**, **f''**) are shown here. **a'** displays performance data as in **Fig. 3e**. Brown and  
30 gray dashed lines indicate the performance thresholds for upgrading to the next stage and  
31 downgrading to the previous stage respectively.

# Supplementary Figure 3

**a**

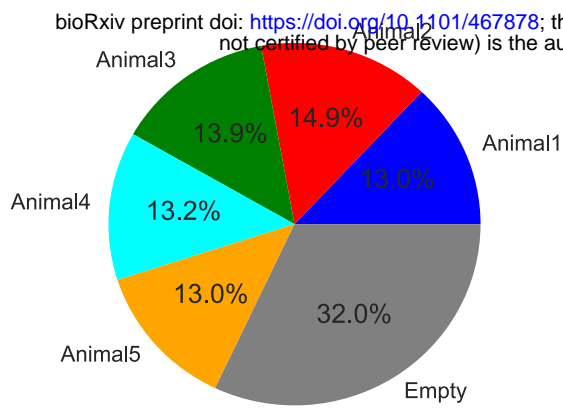

**b**

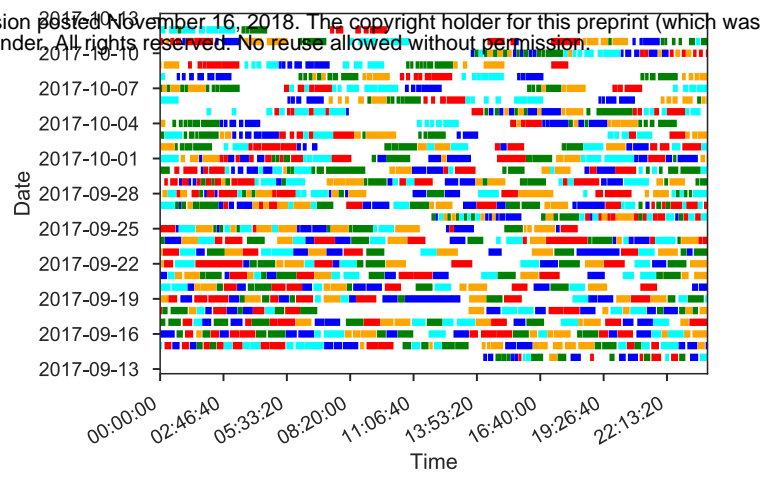

- 32 **Supplementary Fig. 3: Automated training system allows efficient use of the behavior box**  
33 For a sample cohort of five animals, this shows the fraction of time each animal used the  
34 behavior box (**a**) and the activity trace of each animal throughout one month.

# Supplementary Figure 4

bioRxiv preprint doi: <https://doi.org/10.1101/467878>; this version posted November 16, 2018. The copyright holder for this preprint (which was not certified by peer review) is the author/funder. All rights reserved. No reuse allowed without permission.

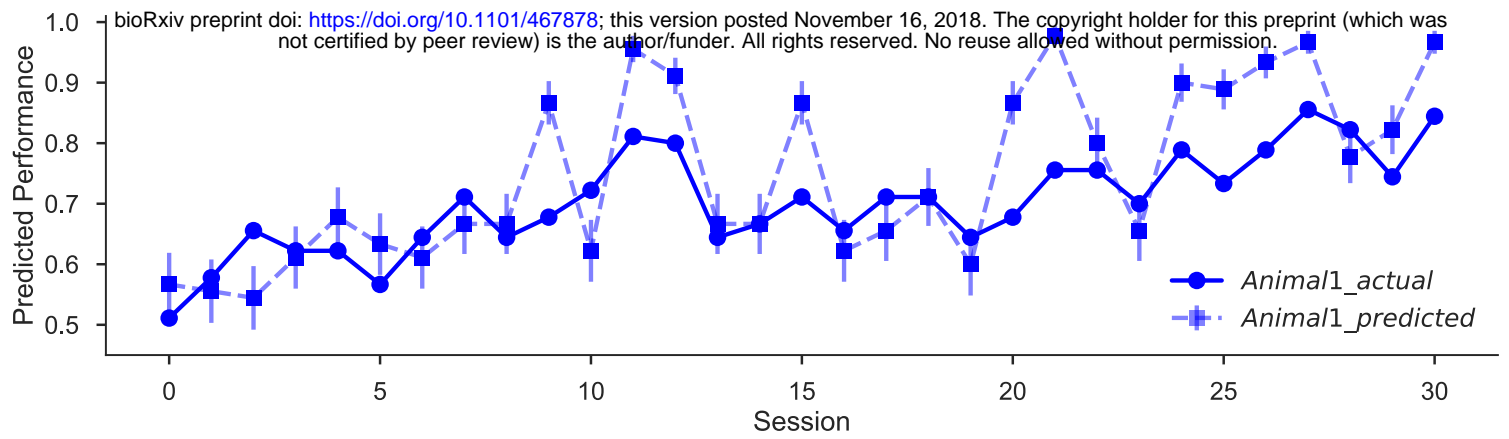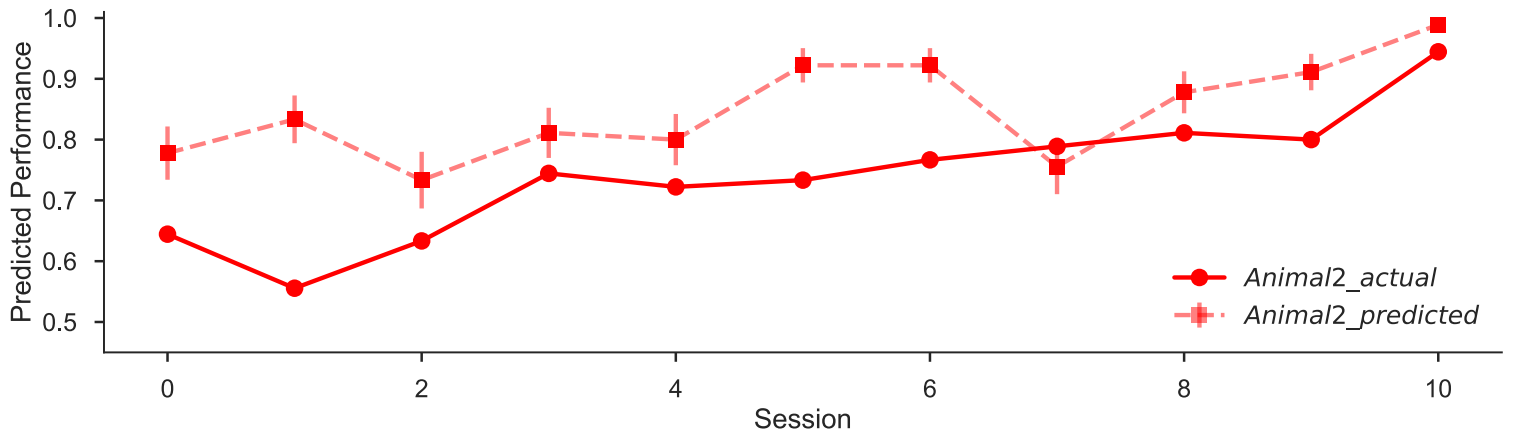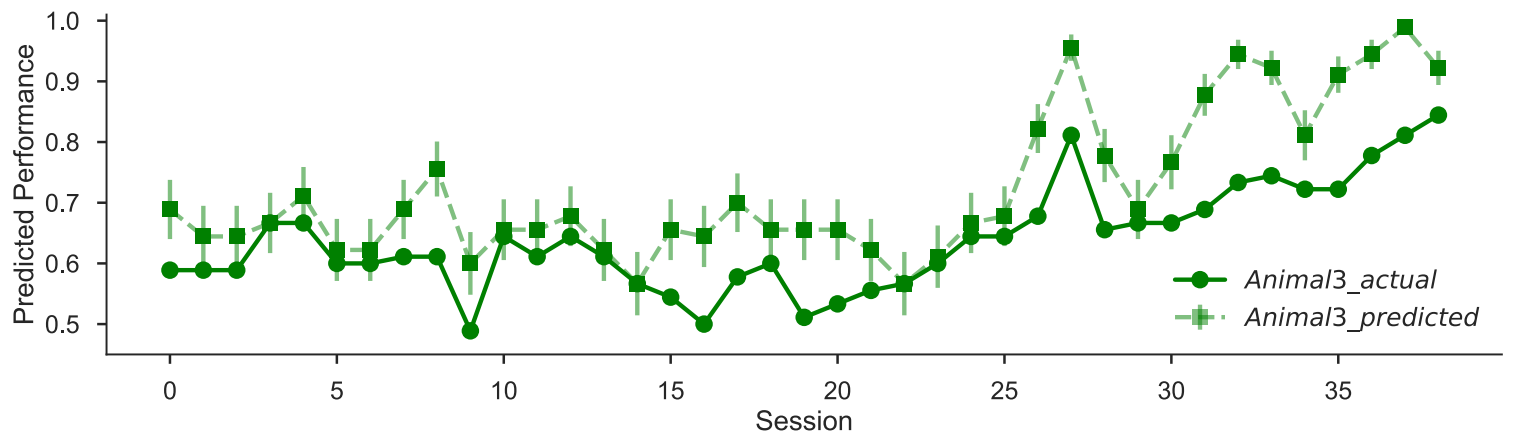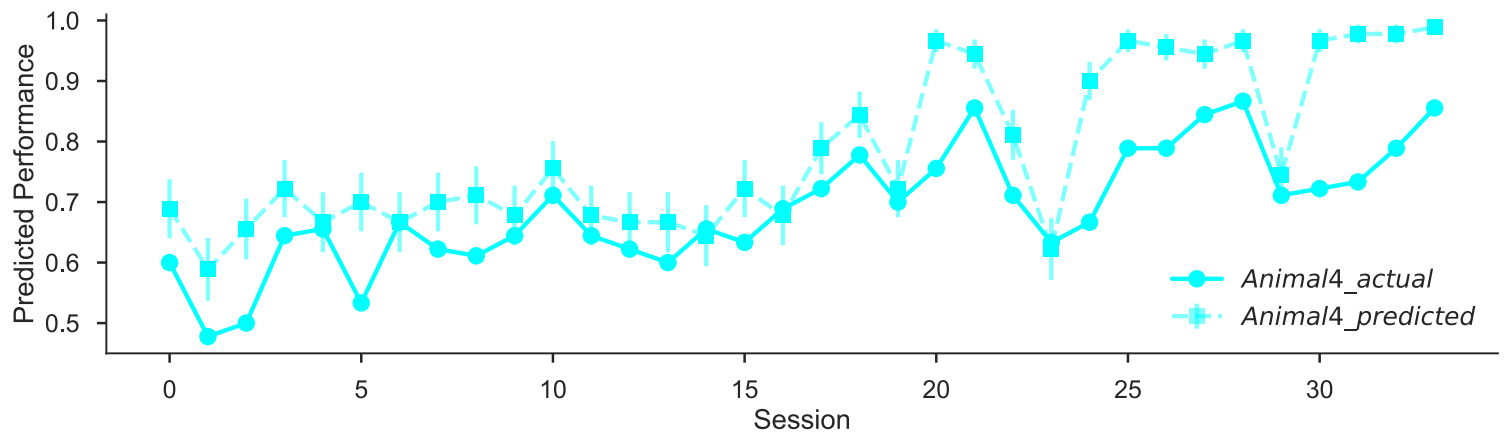

35 **Supplementary Fig. 4: Additional analysis on the iterative generalized linear model's**  
36 **prediction accuracy**

37 The actual performance and the performance predicted by the model, for each of the four  
38 animals. Note that the predictions recapitulate the more prominent fluctuations in the actual  
39 learning curves. Error bars indicate standard errors.

# Supplementary Figure 5

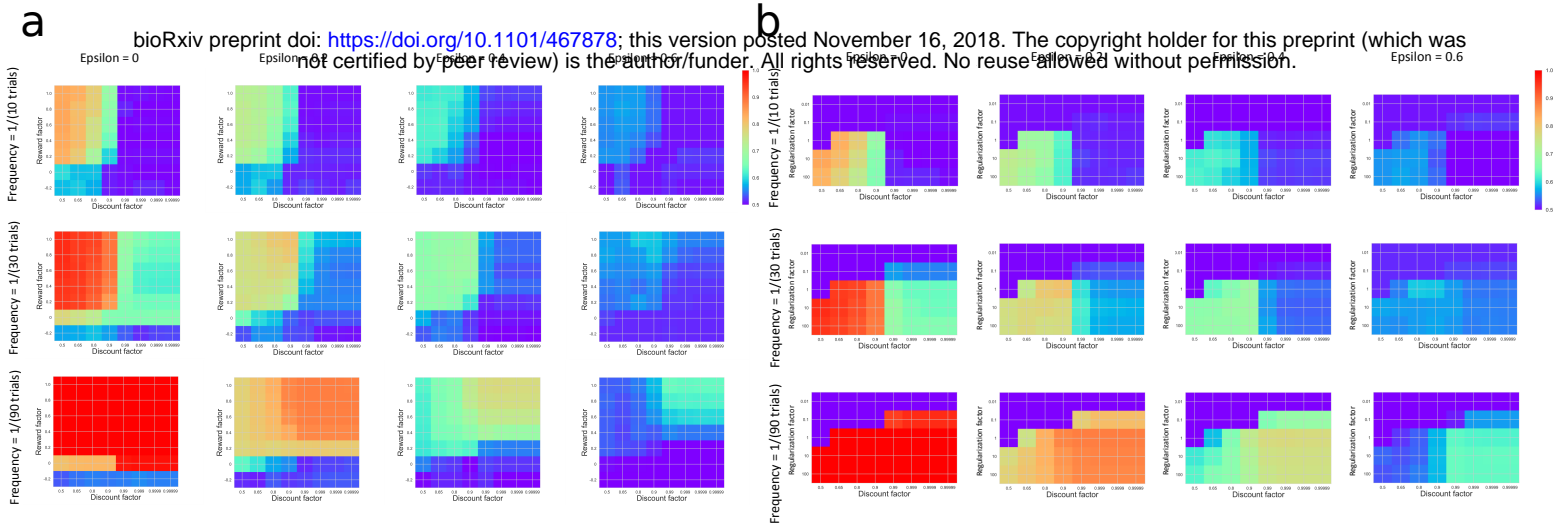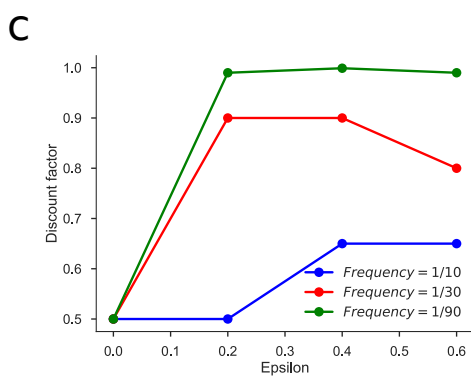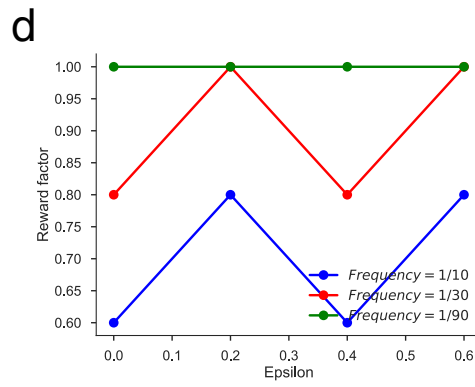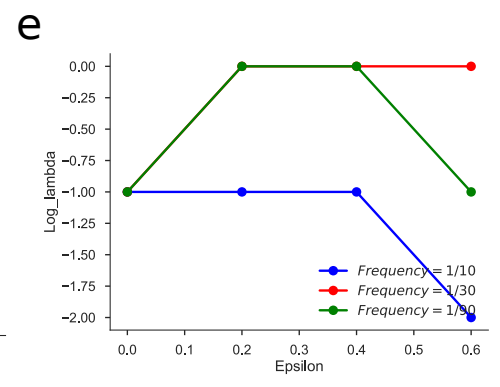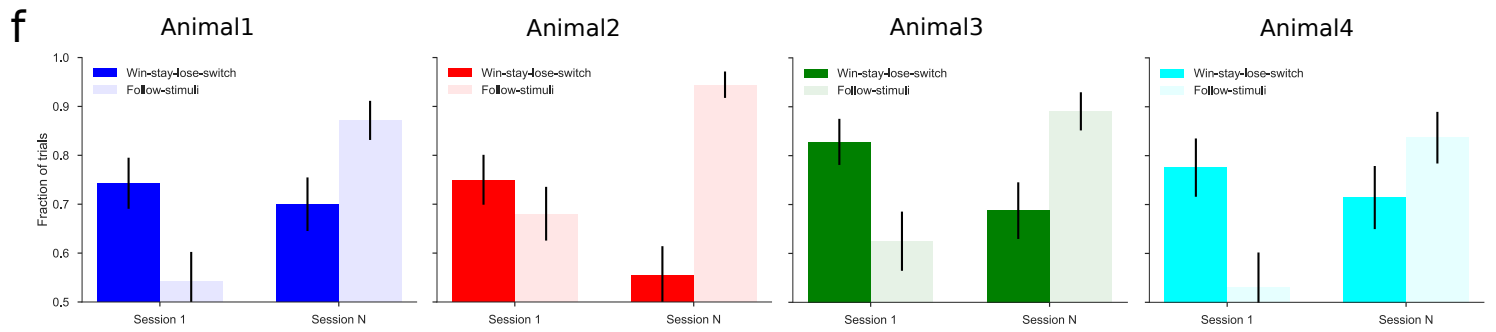



40 **Supplementary Fig. 5: Iterative generalized linear model captures differences between**  
41 **individuals and policy changes**  
42 **(a-b)** Hyperparameter selection for the GLMs fitted to the simulated data generated from the  
43 ground truth policies. Different values of policy change frequency and noise level (epsilon) lead  
44 to different landscapes of the hyperparameters. **(c-e)** Selected temporal discount factor **(c)**,  
45 reward factor **(d)** and regularization factor **(e)** for different values of policy change frequency  
46 and noise level (epsilon). **(f)** Fraction of the trials explained by the two policies (win-stay-lose-  
47 switch or WSLS, and following the stimuli) in the first and last sessions, for each of the four  
48 animals.

# Supplementary Figure 6

**a** bioRxiv preprint doi: <https://doi.org/10.1101/467878>; this version posted November 16, 2018. The copyright holder for this preprint (which was not certified by peer review) is the author/funder. All rights reserved. No reuse allowed without permission.

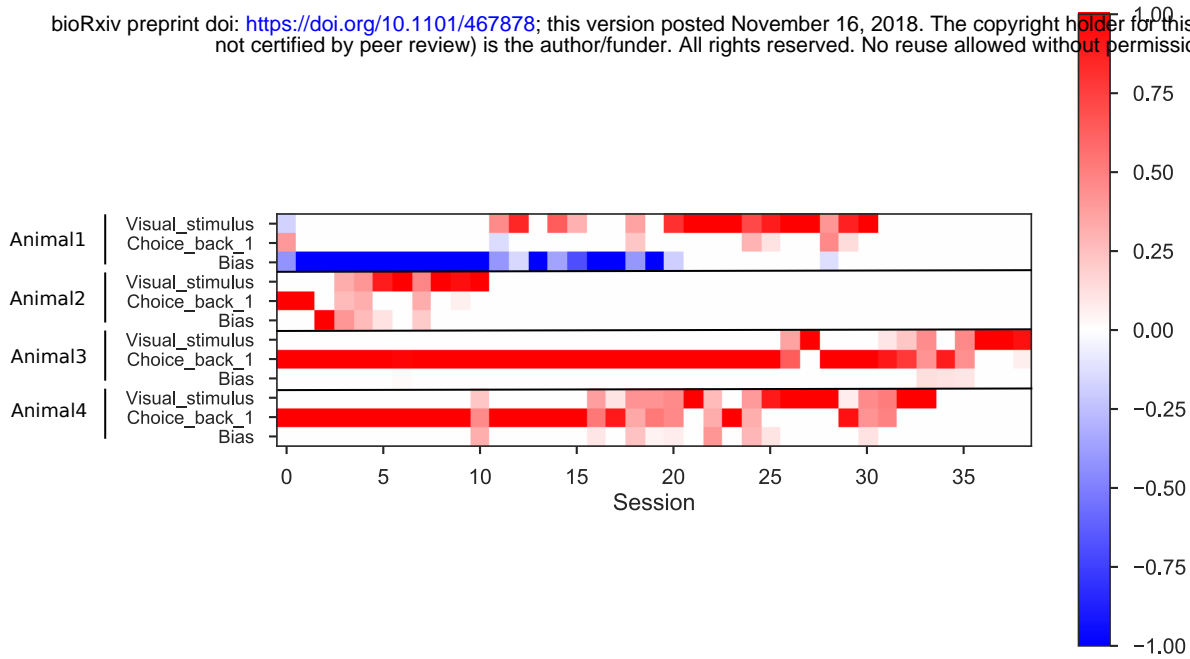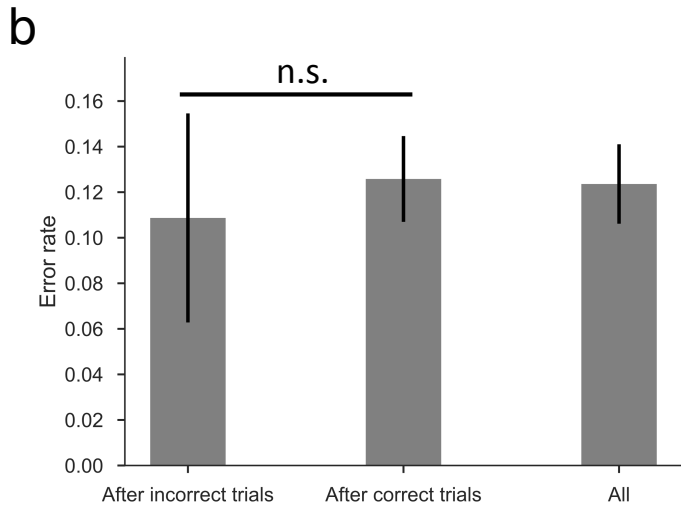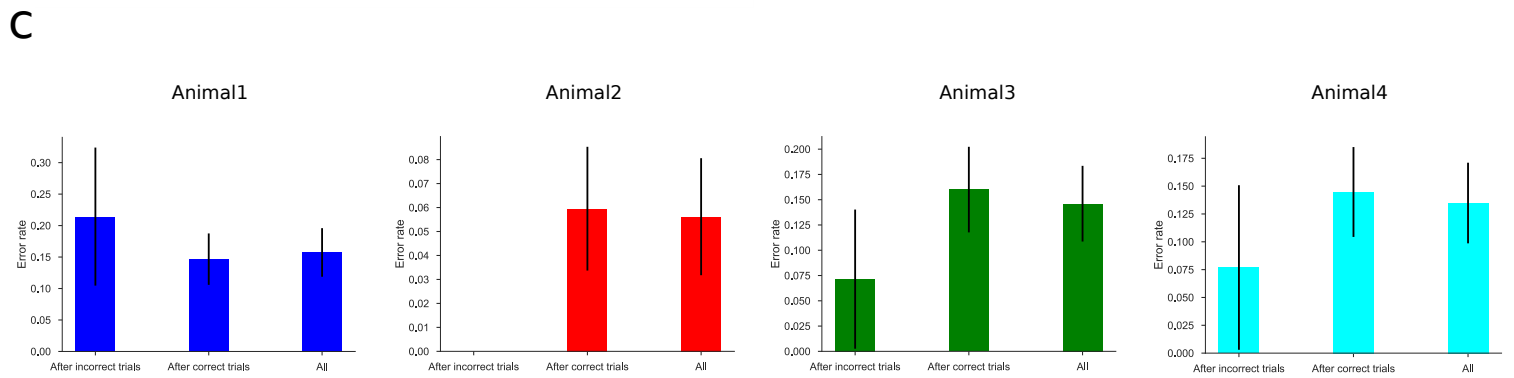

49 **Supplementary Fig. 6: Additional analyses of policy changes during learning**

50 **(a)** Policy matrices over sessions of the four animals. Here the policy matrices are recovered  
51 from logistic regression using only the trials following a correct response. Because the reward of  
52 the last trial is always +1, the term Reward\_back\_1 is the same as Bias, and the term  
53 RewardxChoice\_back\_1 is equal to Choice\_back\_1, so we drop them to avoid redundancy. **(b-c)**  
54 Quantification of the error rate during the last session, comparing trials following a correct  
55 response to those following a mistake. Averaged over all four animals **(b)** and for each of the  
56 four animals **(c)**. n.s. indicates not significant.

# Supplementary Figure 7

**a** bioRxiv preprint doi: <https://doi.org/10.1101/467878>; this version posted November 16, 2018. The copyright holder for this preprint (which was not certified by peer review) is the author/funder. All rights reserved. No reuse allowed without permission.

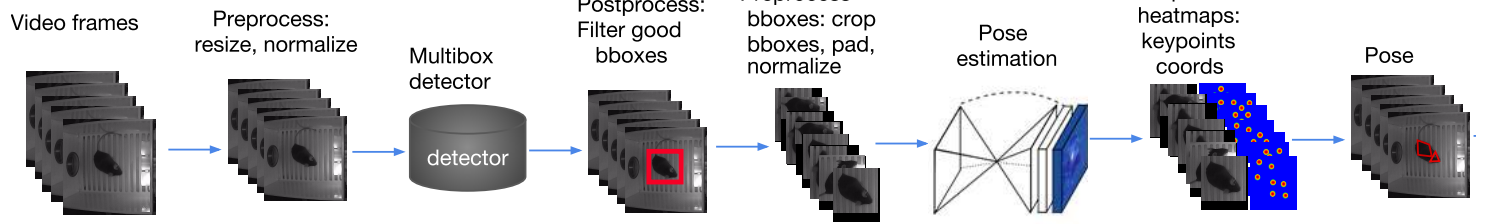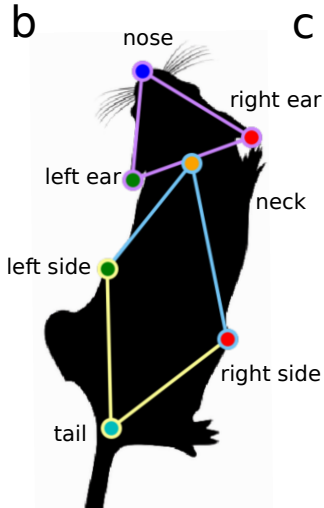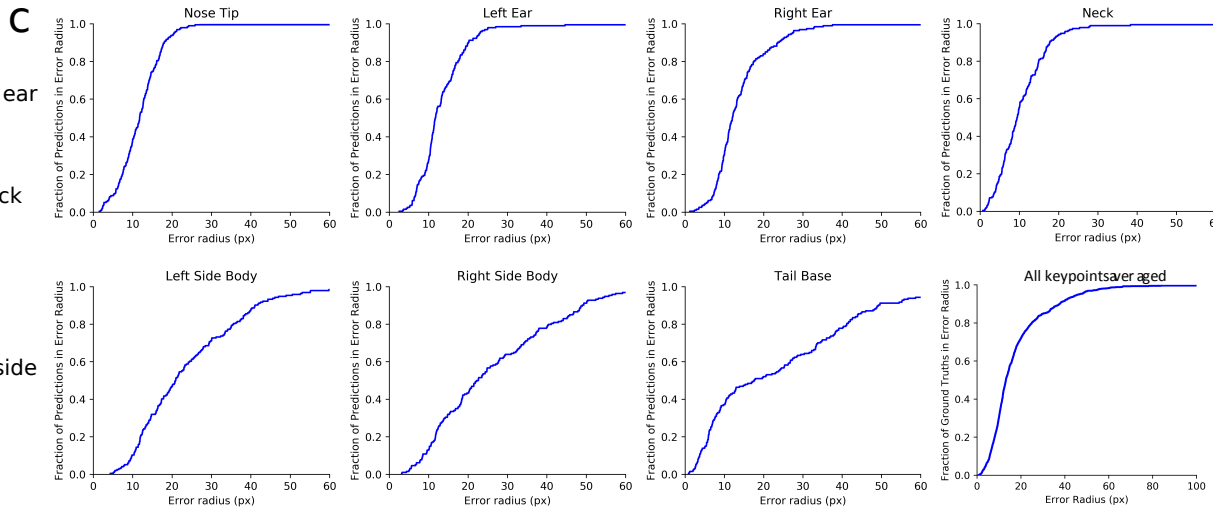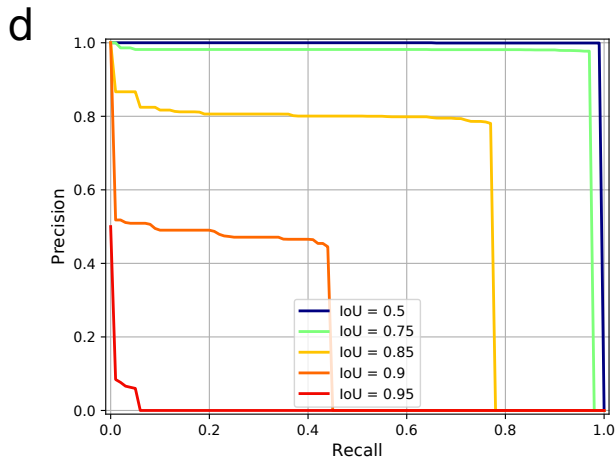

57 **Supplementary Fig. 7: Technical details of the automated behavior assessment software**

58 **(a)** Detailed illustration of the automated behavior assessment software as presented in **Fig. 5a**.  
59 Video frames are first preprocessed (resized and normalized) and then passed through the MSC-  
60 Multibox detector (the first deep neural network (DNN)) to generate bounding boxes covering  
61 the mouse body. Then images of the mouse around the bounding box are cropped, padded and  
62 normalized for pose estimation. Pose estimation is done by Stacked Hourglass Network (the  
63 second DNN), which produces seven keypoint coordinates for body landmarks as shown in **b**.  
64 **(b)** The seven body landmarks of the nose, the ears, the neck, the body sides, and the tail. **(c)**  
65 Percentage of Correct Keypoint (PCK) curves. The fraction of inferred keypoints that lie within a  
66 specified pixel radius of the true location (10 pixels = 0.25 cm). On average over all seven  
67 keypoints ~80% lie within an error radius of 0.5 cm. **(d)** Precision-Recall curves at different  
68 thresholds of Intersection over Union (IoU) w.r.t ground truth bounding box. An IoU of 75%  
69 already detects mice very effectively, with precision and recall above 95% .

# Supplementary Figure 8

a

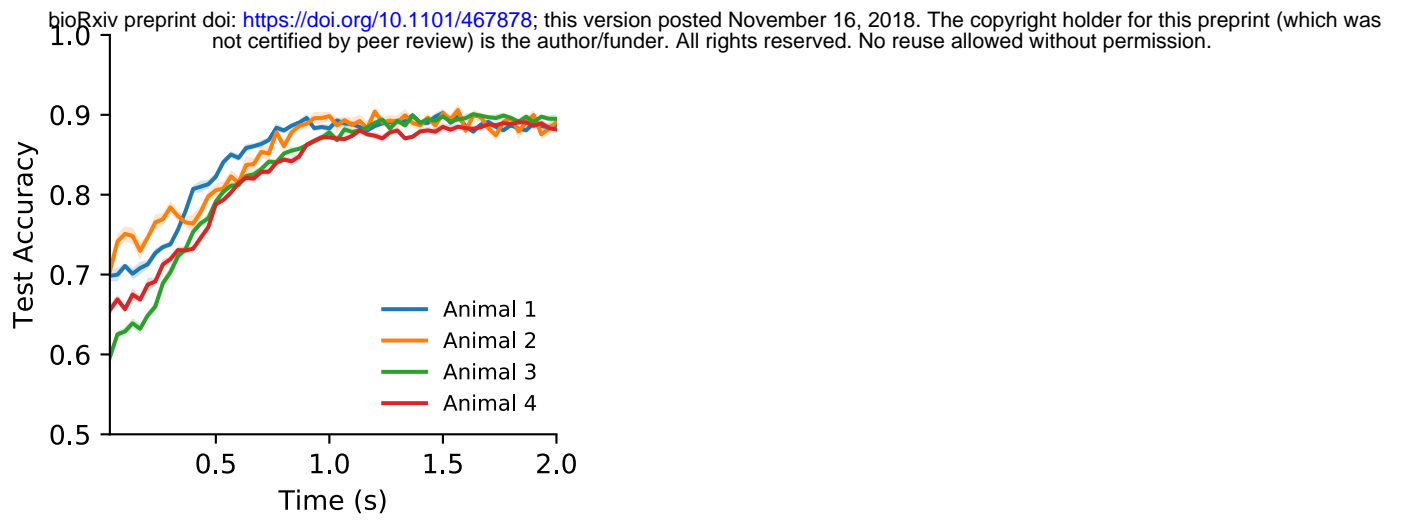

b

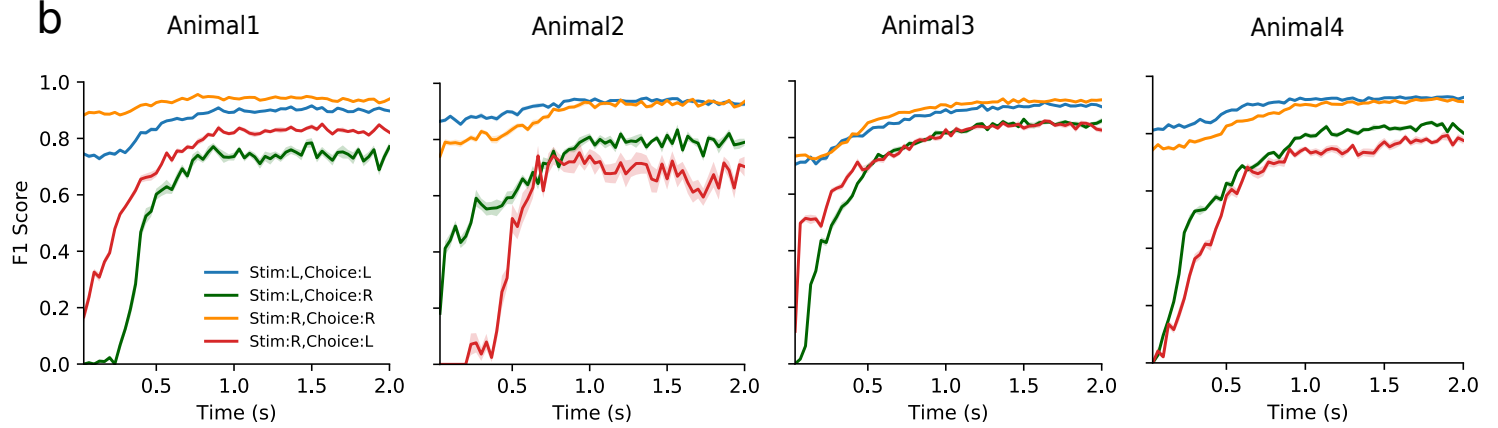

70 **Supplementary Fig. 8: Performance of the support vector machine to infer trial category**  
71 **from mouse trajectories**  
72 **(a)** Prediction accuracy of the SVMs for individual animals. **(b)** F1 score of the SVM fitted for  
73 the decision categories of each animal. Shaded region denotes standard error.

# Supplementary Figure 9

bioRxiv preprint doi: <https://doi.org/10.1101/468784>; this version posted November 4, 2018. The copyright holder for this preprint (which was not certified by peer review) is the author/funder. All rights reserved. No reuse allowed without permission.

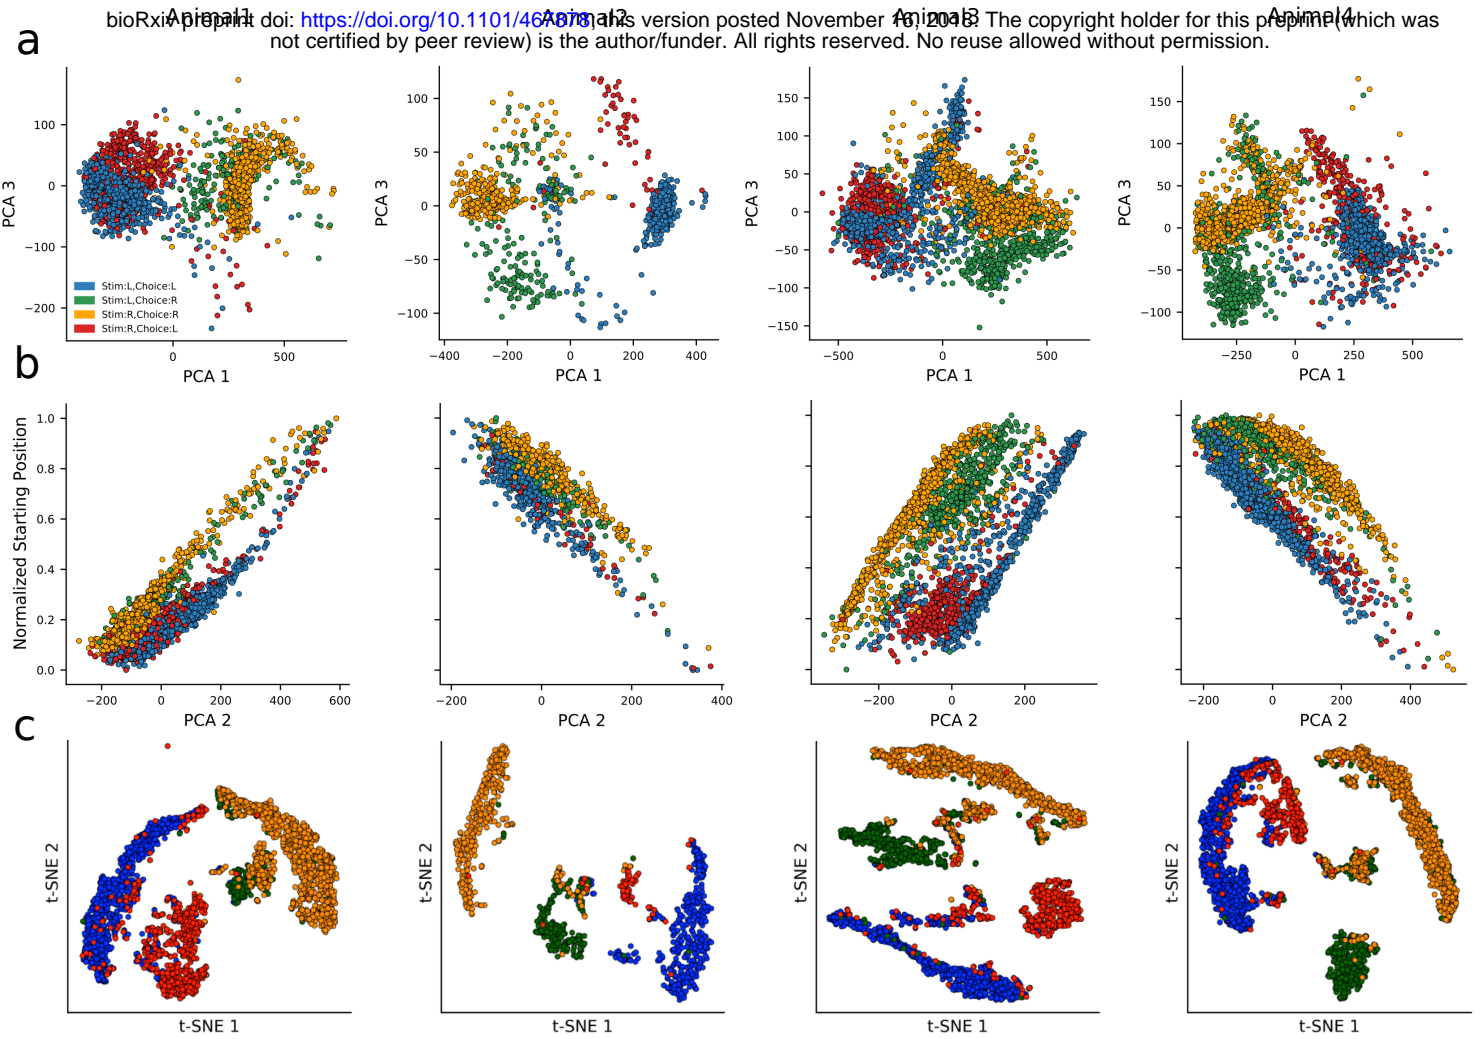



74 **Supplementary Fig. 9: Additional information on the unsupervised analysis of behavior**  
75 **trajectories**

76 **(a)** Projection of trajectories onto PC1 and PC3. Different decision categories are indicated by  
77 different colors, which is the same for **b** and **c**. **(b)** Scatter plot of starting positions along the left-  
78 right axis against PC2 shows correlation between the two. Starting positions are normalized to  
79 range from 0 (the leftmost position) and 1 (the rightmost position). **(c)** t-SNE plots with colors  
80 indicating different decision categories.

81 **Supplementary Video 1:**

82 [https://drive.google.com/open?id=1Ng5s1UhlFRdV4mZ5b1Ot7EUpaEiUXN2\\_](https://drive.google.com/open?id=1Ng5s1UhlFRdV4mZ5b1Ot7EUpaEiUXN2_)

83

84 **Supplementary Video 2:**

85 <https://drive.google.com/open?id=15qgqM5qOd30kajT-IQkCf8flcF80U2qV>

86

87 **Supplementary Video 3:**

88 [https://drive.google.com/open?id=1zqja6\\_3bA2jO9ap0EWd5t\\_Z\\_dVOA8FmA](https://drive.google.com/open?id=1zqja6_3bA2jO9ap0EWd5t_Z_dVOA8FmA)

89

90 **Supplementary Video 4:**

91 <https://drive.google.com/open?id=1wiaaBD-sfZTudDbpRM0ByB2n9bTKyaid>

92

93 **Supplementary Video 5:**

94 <https://drive.google.com/open?id=1yjaZXDUS3TKzDR4YGHYUlbwbq0OfUmI4>

95

96 **Supplementary Video 6:**

97 [https://drive.google.com/open?id=1ISELpiyI0Yh\\_EoiGn7aX1GLSoUaFtjKa](https://drive.google.com/open?id=1ISELpiyI0Yh_EoiGn7aX1GLSoUaFtjKa)

98

99 **Supplementary Video 7:**

100 <https://drive.google.com/open?id=1dILuZRIwAU48RwLEEkt1CBzmPQnqF95r>

101
